# Supplementary material for: Public Availability of Published Research Data in High-Impact Journals
Source: PLoS One. 2011 Sep 7;6(9):e24357. doi: 10.1371/journal.pone.0024357 (PMC3168487; doi:10.1371/journal.pone.0024357)
Supplement: Appendix S1 — Summary of journal policies as they relate to data sharing. (XLS) [file pone.0024357.s001.xls]

## Sheet: Sheet 1
Journal	Microarray	Nucleic Acid	Protein	Materials	Macromolecular Structure	Statement	Comment	.
American Journal of Human Genetics	Nucleic acid and protein sequences, single-nucleotide polymorphisms (SNPs), copy number variants (CNVs), microarray data, and macromolecular structures determined by X-ray crystallography (along with structure factors) must be deposited in the appropriate public database and must be accessible without restriction from the date of publication.	Nucleic acid and protein sequences, single-nucleotide polymorphisms (SNPs), copy number variants (CNVs), microarray data, and macromolecular structures determined by X-ray crystallography (along with structure factors) must be deposited in the appropriate public database and must be accessible without restriction from the date of publication.	Nucleic acid and protein sequences, single-nucleotide polymorphisms (SNPs), copy number variants (CNVs), microarray data, and macromolecular structures determined by X-ray crystallography (along with structure factors) must be deposited in the appropriate public database and must be accessible without restriction from the date of publication.	An implicit term and condition of publishing in AJHG is that authors be willing to distribute any materials and protocols used in the published experiments to qualified researchers for their own use.	Nucleic acid and protein sequences, single-nucleotide polymorphisms (SNPs), copy number variants (CNVs), microarray data, and macromolecular structures determined by X-ray crystallography (along with structure factors) must be deposited in the appropriate public database and must be accessible without restriction from the date of publication.	.	.	.
American Journal of Psychiatry				.	.		Nil	.
American Journal of Respiratory and Critical Care Medicine	Authors' responsibility to adhere to MIAME guidelines, submit all primary microarray to one of the public repositories by the time of publication	Sequences should be deposited in EMBL or Genbank databases and accession numbers submitted prior to publication	Sequences should be deposited in EMBL or Genbank databases and accession numbers submitted prior to publication	.	.		.	.
Annals of Internal Medicine	.	.	.	.	.	Annals will publish a statement indicating the author's willingness to share the following items with the public: study protocol, statistical code, and datasets from which the results were derived. Annals does not require the sharing of these items, but only a declaration of willingness to share and any conditions for sharing	.	.
Annals of Neurology	.	.	.	.	.	.	Nil	.
Archives of General Psychiatry	.	Large genomic datasets should be deposited in a publicly available database with a complete accession number before submission of manuscript	Large genomic datasets should be deposited in a publicly available database with a complete accession number before submission of manuscript	.	.	.	.	.
Blood	The journal requires that authors deposit their microarray data into a public database. An accession number must be supplied parenthetically at a relevant location in text.	Original DNA sequences reported in Blood must also be submitted to GenBank	Besides mRNA gene expression microarrays, other high-throughput datasets includes miRNA arrays, ChIP-chip arrays, CGH (comparative genomic hybridization), SNP arrays, protein arrays, SAGE, MPSS, and high throughput quantitative sequence data must also be deposited into a publically-accessible platform such as GEO	Blood policy requires that any readily renewable resources mentioned in a Journal article and not already obtained from commercial resources will be made available to all qualified investigators in the field. The policy stems from the principle that authenticity requires reproducibility.	.	.	Besides mRNA gene expression microarrays, other high-throughput datasets includes miRNA arrays, ChIP-chip arrays, CGH (comparative genomic hybridization), SNP arrays, protein arrays, SAGE, MPSS, and high throughput quantitative sequence data must also be deposited into a publically-accessible platform such as GEO	.
British Medical Journal	.	.	.	.	.	We ask authors to include a data sharing statement at the end of each original research article. The statement should explain which additional data from the study—if any—are available, to whom, and how	.	.
Cell	Nucleic acid and protein sequences and microarray data must be deposited in the appropriate public database and must be accessible without restriction from the date of publication. An entry name or accession number must be included	Nucleic acid and protein sequences and microarray data must be deposited in the appropriate public database and must be accessible without restriction from the date of publication. An entry name or accession number must be included	Nucleic acid and protein sequences and microarray data must be deposited in the appropriate public database and must be accessible without restriction from the date of publication. An entry name or accession number must be included	One of the terms and conditions of publishing in Cell is that authors be willing to distribute any materials (e.g. DNA, antibodies, reagents, organisms, mouse strains) and protocols used in the published experiments to qualified researchers for their own use.	Macromolecular structure (x-ray, NMR, electron micropscopy) data must be deposited in the appropriate public database	.	Authors are encouraged to contribute additional information to the appropriate databases	.
Circulation	Data should follow the MIAME checklist. Authors of papers that include genomic, proteomic, or other high-throughput data are required to make their data easily accessible for the reviewers and the editors during the review process. You may submit your data to the NCBI gene expression and hybridization array data repository	Newly reported nucleotide or protein sequences must be deposited in GenBank or EMBL databases, and an accession number must be obtained. Access to the information in the database must be available at the time of publication	Newly reported nucleotide or protein sequences must be deposited in GenBank or EMBL databases, and an accession number must be obtained. Access to the information in the database must be available at the time of publication	.	.	.	.	.
Circulation Research	Data should follow the MIAME checklist. Authors of papers that include genomic, proteomic, or other high-throughput data are required to make their data easily accessible for the reviewers and the editors during the review process. You may submit your data to the NCBI gene expression and hybridization array data repository	Newly reported nucleotide or protein sequences must be deposited in GenBank or EMBL databases, and an accession number must be obtained. Access to the information in the database must be available at the time of publication	Newly reported nucleotide or protein sequences must be deposited in GenBank or EMBL databases, and an accession number must be obtained. Access to the information in the database must be available at the time of publication	To allow others to replicate and build on work published in Circulation Research, we recommend that authors make materials, data, and associated protocols available to readers. Authors must disclose upon submission of the manuscript any restrictions on the availability of materials or information. We recommend that authors make unique materials (e.g. cloned DNAs; antibodies; bacterial, animal or …	.	.	.	.
Current Biology	Nucleic acid and protein sequences and microarray data must be deposited in the appropriate public database and must be accessible without restriction from the date of publication. An entry name or accession number must be included	Nucleic acid and protein sequences and microarray data must be deposited in the appropriate public database and must be accessible without restriction from the date of publication. An entry name or accession number must be included	Nucleic acid and protein sequences and microarray data must be deposited in the appropriate public database and must be accessible without restriction from the date of publication. An entry name or accession number must be included	One of the terms and conditions of publishing in Current Biology is that authors be willing to distribute any materials (e.g. DNA, antibodies, reagents, organisms, mouse strains) and protocols used in the published experiments to qualified researchers for their own use.	Macromolecular structure (x-ray, NMR, electron micropscopy) data must be deposited in the appropriate public database	.	Authors are encouraged to contribute additional information to the appropriate databases	.
Developmental Cell	Nucleic acid and protein sequences and microarray data must be deposited in the appropriate public database and must be accessible without restriction from the date of publication. An entry name or accession number must be included	Nucleic acid and protein sequences and microarray data must be deposited in the appropriate public database and must be accessible without restriction from the date of publication. An entry name or accession number must be included	Nucleic acid and protein sequences and microarray data must be deposited in the appropriate public database and must be accessible without restriction from the date of publication. An entry name or accession number must be included	One of the terms and conditions of publishing in Developmental Cell is that authors be willing to distribute any materials (e.g. DNA, antibodies, reagents, organisms, mouse strains) and protocols used in the published experiments to qualified researchers for their own use.	Macromolecular structure (x-ray, NMR, electron micropscopy) data must be deposited in the appropriate public database	.	Authors are encouraged to contribute additional information to the appropriate databases	.
Gastroenterology	Transcript profiling (expression microarray) data must be submitted to an appropriate repository (either NCBI's GEO or EBI's ArrayExpress). The data should preferably be MIAME compliant	Prior to the submission of newly cloned genes or nucleic acid sequences, the Journal requires authors to provide an accession number to a publicly accessible, recognized data repository	Prior to the submission of newly cloned genes or nucleic acid sequences, the Journal requires authors to provide an accession number to a publicly accessible, recognized data repository	Authors are expected to make available materials such as cell lines, cDNA clones, hybridomas, antibodies, biological reagents, unique animals, etc. to any qualified investigator	.	.	.	.
Genes and Development	.	Authors should submit nucleic acid and protein sequences, and X-ray crystallographic data to the appropriate database.	Authors should submit nucleic acid and protein sequences, and X-ray crystallographic data to the appropriate database.	It is understood that researchers who submit papers to this journal are prepared to make available to qualified academic researchers materials needed to duplicate their research results (DNA, cell lines, antibodies, microbial strains, mice lines, etc.)	Authors should submit nucleic acid and protein sequences, and X-ray crystallographic data to the appropriate database.	.	.	.
Genome Research	Genome Research encourages all data producers to make their data as freely accessible as possible prior to publication. Data from a publication must be easily available to the broader community in publicly held databases when available, and at the Genome Research Web site, and if desired at the author's Web site, when they are not. Genome Research will NOT consider manuscripts where data used in …	Genome Research encourages all data producers to make their data as freely accessible as possible prior to publication. Data from a publication must be easily available to the broader community in publicly held databases when available, and at the Genome Research Web site, and if desired at the author's Web site, when they are not. Genome Research will NOT consider manuscripts where data used in …	Genome Research encourages all data producers to make their data as freely accessible as possible prior to publication. Data from a publication must be easily available to the broader community in publicly held databases when available, and at the Genome Research Web site, and if desired at the author's Web site, when they are not. Genome Research will NOT consider manuscripts where data used in …	Researchers who submit papers to this journal should be prepared to make available to researchers all materials needed to duplicate their work	Genome Research encourages all data producers to make their data as freely accessible as possible prior to publication. Data from a publication must be easily available to the broader community in publicly held databases when available, and at the Genome Research Web site, and if desired at the author's Web site, when they are not. Genome Research will NOT consider manuscripts where data used in …	.	Genome Research encourages all data producers to make their data as freely accessible as possible prior to publication. Data from a publication must be easily available to the broader community in publicly held databases when available, and at the Genome Research Web site, and if desired at the author's Web site, when they are not. Genome Research will NOT consider manuscripts where data used in …	.
Gut	.	.	.	.	.	.	Nil	.
Hepatology	.	In papers reporting a novel DNA or amino acid sequence, verify that the data have been or will be submitted either to GenBank or EMBL, and provide the accession number.	In papers reporting a novel DNA or amino acid sequence, verify that the data have been or will be submitted either to GenBank or EMBL, and provide the accession number.	It is understood that authors publishing in HEPATOLOGY will make cloned DNA, hybridomas, mutant animals, and other resources available to qualified investigators.	.	.	.	.
Immunity	Nucleic acid and protein sequences and microarray data must be deposited in the appropriate public database and must be accessible without restriction from the date of publication. An entry name or accession number must be included	Nucleic acid and protein sequences and microarray data must be deposited in the appropriate public database and must be accessible without restriction from the date of publication. An entry name or accession number must be included	Nucleic acid and protein sequences and microarray data must be deposited in the appropriate public database and must be accessible without restriction from the date of publication. An entry name or accession number must be included	One of the terms and conditions of publishing in Immunity is that authors be willing to distribute any materials (e.g. DNA, antibodies, reagents, organisms, mouse strains) and protocols used in the published experiments to qualified researchers for their own use.	Macromolecular structure (x-ray, NMR, electron micropscopy) data must be deposited in the appropriate public database	.	Authors are encouraged to contribute additional information to the appropriate databases	.
JAMA	.	Before submission of a research manuscript reporting on large genomic data sets (eg, protein or DNA sequences), the data sets should be deposited in a publicly available database, such as NCBI’s GenBank and a complete accession number (and version number if appropriate) must be provided	Before submission of a research manuscript reporting on large genomic data sets (eg, protein or DNA sequences), the data sets should be deposited in a publicly available database, such as NCBI’s GenBank and a complete accession number (and version number if appropriate) must be provided	.	.	.	.	.
Journal of Cell Biology	Nucleic acid and protein sequences, microarray data, and structural data must be deposited in a public database and must be available on the date of publication. Relevant accession numbers must be included in the manuscript text.	Nucleic acid and protein sequences, microarray data, and structural data must be deposited in a public database and must be available on the date of publication. Relevant accession numbers must be included in the manuscript text.	Nucleic acid and protein sequences, microarray data, and structural data must be deposited in a public database and must be available on the date of publication. Relevant accession numbers must be included in the manuscript text.	The JCB requires the free exchange of all clones, cell lines, and biological reagents used in studies published in the Journal	Nucleic acid and protein sequences, microarray data, and structural data must be deposited in a public database and must be available on the date of publication. Relevant accession numbers must be included in the manuscript text.	.	The editors reserve the right to request original data from authors at any stage in the publication process, including post-publication	.
Journal of Clinical Investigation	Microarray data should be made freely available to academic researchers on authors' own web sites or other freely available web site	Authors must submit original nucleotide or amino acid sequence data to GenBank, European Molecular Biology Laboratory (EMBL), DNA Databank of Japan, or other appropriate, identified, publicly available database in general use in the field that gives free access to researchers from the date of publication. Accession numbers should appear in the manuscript	Authors must submit original nucleotide or amino acid sequence data to GenBank, European Molecular Biology Laboratory (EMBL), DNA Databank of Japan, or other appropriate, identified, publicly available database in general use in the field that gives free access to researchers from the date of publication. Accession numbers should appear in the manuscript	As a condition of publication, authors are required to make materials and methods used freely available to academic researchers for their own use.	.	.	Other supporting data sets must be made available to any interested reader on the publication date from the authors directly	.
Journal of Clinical Oncology	.	.	.	.	.	.	Nil	.
Journal of Experimental Medicine	Nucleic acid sequences, protein sequences, crystallographic structures, and microarray data must deposited in the appropriate public database and must be made available by the date of publication.	Nucleic acid sequences, protein sequences, crystallographic structures, and microarray data must deposited in the appropriate public database and must be made available by the date of publication.	Nucleic acid sequences, protein sequences, crystallographic structures, and microarray data must deposited in the appropriate public database and must be made available by the date of publication.	The JEM requires the free exchange of any materials used in studies published in the Journal	Nucleic acid sequences, protein sequences, crystallographic structures, and microarray data must deposited in the appropriate public database and must be made available by the date of publication.	.	The editors reserve the right to request original data from authors at any stage in the publication process, including after publication	.
Journal of the American College of Cardiology	.	.	.	.	.	.	Nil	.
Journal of the National Cancer Institute	Microarray and proteomic data serving as the basis of manuscripts published in the Journal of the National Cancer Institute should be made publicly available at the time of publication.	Before final acceptance of any manuscript containing new nucleotide and/or amino acid sequences, the author(s) must deposit the sequence information with the GenBank database	Before final acceptance of any manuscript containing new nucleotide and/or amino acid sequences, the author(s) must deposit the sequence information with the GenBank database	Authors of papers published in the Journal are expected to honor reasonable requests from qualified researchers to share biological materials that were used in the reported study.	.	.	.	.
Lancet	Authors of microarray papers should include in their submission the information recommended by the MIAME guidelines. Authors should also submit their experimental details to one of the publicly available databases: ArrayExpress or GEO.	Novel gene sequences should be deposited in a public database (GenBank, EMBL, or DDBJ), and the accession number provided	.	.	.	.	Authors may be asked to provide the raw data for research papers when they are under review and up to 10 years after publication in The Lancet.	.
Molecular and Cellular Proteomics	.	Newly reported nucleotide or protein sequences must be deposited in GenBank or EMBL databases, and an accession number must be obtained BEFORE the paper is accepted in the Associate Editor's office	Newly reported nucleotide or protein sequences must be deposited in GenBank or EMBL databases, and an accession number must be obtained BEFORE the paper is accepted in the Associate Editor's office	.	Authors of papers describing new structure determinations must submit to the Protein Data Bank at Research Collaboratory for Structural Bioinformatics http://www.rcsb.org/pdb all structural data required to validate the conclusions, including both x-ray amplitudes and phases and the derived atomic coordinates.	.	.	.
Molecular Cell	Nucleic acid and protein sequences and microarray data must be deposited in the appropriate public database and must be accessible without restriction from the date of publication. An entry name or accession number must be included	Nucleic acid and protein sequences and microarray data must be deposited in the appropriate public database and must be accessible without restriction from the date of publication. An entry name or accession number must be included	Nucleic acid and protein sequences and microarray data must be deposited in the appropriate public database and must be accessible without restriction from the date of publication. An entry name or accession number must be included	One of the terms and conditions of publishing in Molecular Cell is that authors be willing to distribute any materials (e.g. DNA, antibodies, reagents, organisms, mouse strains) and protocols used in the published experiments to qualified researchers for their own use.	Macromolecular structure (x-ray, NMR, electron micropscopy) data must be deposited in the appropriate public database	.	Authors are encouraged to contribute additional information to the appropriate databases	.
Nano Letters	.	.	.	.	.	.	Nil	.
Nature	A condition of publication in a Nature journal is that authors are required to make materials, data and associated protocols promptly available to readers without preconditions	A condition of publication in a Nature journal is that authors are required to make materials, data and associated protocols promptly available to readers without preconditions	A condition of publication in a Nature journal is that authors are required to make materials, data and associated protocols promptly available to readers without preconditions	A condition of publication in a Nature journal is that authors are required to make materials, data and associated protocols promptly available to readers without preconditions	A condition of publication in a Nature journal is that authors are required to make materials, data and associated protocols promptly available to readers without preconditions	.	A condition of publication in a Nature journal is that authors are required to make materials, data and associated protocols promptly available to readers without preconditions	.
Nature Biotechonology	A condition of publication in a Nature journal is that authors are required to make materials, data and associated protocols promptly available to readers without preconditions	A condition of publication in a Nature journal is that authors are required to make materials, data and associated protocols promptly available to readers without preconditions	A condition of publication in a Nature journal is that authors are required to make materials, data and associated protocols promptly available to readers without preconditions	A condition of publication in a Nature journal is that authors are required to make materials, data and associated protocols promptly available to readers without preconditions	A condition of publication in a Nature journal is that authors are required to make materials, data and associated protocols promptly available to readers without preconditions	.	A condition of publication in a Nature journal is that authors are required to make materials, data and associated protocols promptly available to readers without preconditions	.
Nature Cell Biology	A condition of publication in a Nature journal is that authors are required to make materials, data and associated protocols promptly available to readers without preconditions	A condition of publication in a Nature journal is that authors are required to make materials, data and associated protocols promptly available to readers without preconditions	A condition of publication in a Nature journal is that authors are required to make materials, data and associated protocols promptly available to readers without preconditions	A condition of publication in a Nature journal is that authors are required to make materials, data and associated protocols promptly available to readers without preconditions	A condition of publication in a Nature journal is that authors are required to make materials, data and associated protocols promptly available to readers without preconditions	.	A condition of publication in a Nature journal is that authors are required to make materials, data and associated protocols promptly available to readers without preconditions	.
Nature Genetics	A condition of publication in a Nature journal is that authors are required to make materials, data and associated protocols promptly available to readers without preconditions	A condition of publication in a Nature journal is that authors are required to make materials, data and associated protocols promptly available to readers without preconditions	A condition of publication in a Nature journal is that authors are required to make materials, data and associated protocols promptly available to readers without preconditions	A condition of publication in a Nature journal is that authors are required to make materials, data and associated protocols promptly available to readers without preconditions	A condition of publication in a Nature journal is that authors are required to make materials, data and associated protocols promptly available to readers without preconditions	.	A condition of publication in a Nature journal is that authors are required to make materials, data and associated protocols promptly available to readers without preconditions	.
Nature Immunology	A condition of publication in a Nature journal is that authors are required to make materials, data and associated protocols promptly available to readers without preconditions	A condition of publication in a Nature journal is that authors are required to make materials, data and associated protocols promptly available to readers without preconditions	A condition of publication in a Nature journal is that authors are required to make materials, data and associated protocols promptly available to readers without preconditions	A condition of publication in a Nature journal is that authors are required to make materials, data and associated protocols promptly available to readers without preconditions	A condition of publication in a Nature journal is that authors are required to make materials, data and associated protocols promptly available to readers without preconditions	.	A condition of publication in a Nature journal is that authors are required to make materials, data and associated protocols promptly available to readers without preconditions	.
Nature Materials	A condition of publication in a Nature journal is that authors are required to make materials, data and associated protocols promptly available to readers without preconditions	A condition of publication in a Nature journal is that authors are required to make materials, data and associated protocols promptly available to readers without preconditions	A condition of publication in a Nature journal is that authors are required to make materials, data and associated protocols promptly available to readers without preconditions	A condition of publication in a Nature journal is that authors are required to make materials, data and associated protocols promptly available to readers without preconditions	A condition of publication in a Nature journal is that authors are required to make materials, data and associated protocols promptly available to readers without preconditions	.	A condition of publication in a Nature journal is that authors are required to make materials, data and associated protocols promptly available to readers without preconditions	.
Nature Medicine	A condition of publication in a Nature journal is that authors are required to make materials, data and associated protocols promptly available to readers without preconditions	A condition of publication in a Nature journal is that authors are required to make materials, data and associated protocols promptly available to readers without preconditions	A condition of publication in a Nature journal is that authors are required to make materials, data and associated protocols promptly available to readers without preconditions	A condition of publication in a Nature journal is that authors are required to make materials, data and associated protocols promptly available to readers without preconditions	A condition of publication in a Nature journal is that authors are required to make materials, data and associated protocols promptly available to readers without preconditions	.	A condition of publication in a Nature journal is that authors are required to make materials, data and associated protocols promptly available to readers without preconditions	.
Nature Methods	A condition of publication in a Nature journal is that authors are required to make materials, data and associated protocols promptly available to readers without preconditions	A condition of publication in a Nature journal is that authors are required to make materials, data and associated protocols promptly available to readers without preconditions	A condition of publication in a Nature journal is that authors are required to make materials, data and associated protocols promptly available to readers without preconditions	A condition of publication in a Nature journal is that authors are required to make materials, data and associated protocols promptly available to readers without preconditions	A condition of publication in a Nature journal is that authors are required to make materials, data and associated protocols promptly available to readers without preconditions	.	A condition of publication in a Nature journal is that authors are required to make materials, data and associated protocols promptly available to readers without preconditions	.
Nature Neuroscience	A condition of publication in a Nature journal is that authors are required to make materials, data and associated protocols promptly available to readers without preconditions	A condition of publication in a Nature journal is that authors are required to make materials, data and associated protocols promptly available to readers without preconditions	A condition of publication in a Nature journal is that authors are required to make materials, data and associated protocols promptly available to readers without preconditions	A condition of publication in a Nature journal is that authors are required to make materials, data and associated protocols promptly available to readers without preconditions	A condition of publication in a Nature journal is that authors are required to make materials, data and associated protocols promptly available to readers without preconditions	.	A condition of publication in a Nature journal is that authors are required to make materials, data and associated protocols promptly available to readers without preconditions	.
Nature Physics	A condition of publication in a Nature journal is that authors are required to make materials, data and associated protocols promptly available to readers without preconditions	A condition of publication in a Nature journal is that authors are required to make materials, data and associated protocols promptly available to readers without preconditions	A condition of publication in a Nature journal is that authors are required to make materials, data and associated protocols promptly available to readers without preconditions	A condition of publication in a Nature journal is that authors are required to make materials, data and associated protocols promptly available to readers without preconditions	A condition of publication in a Nature journal is that authors are required to make materials, data and associated protocols promptly available to readers without preconditions	.	A condition of publication in a Nature journal is that authors are required to make materials, data and associated protocols promptly available to readers without preconditions	.
Nature Structural and Molecular Biology	A condition of publication in a Nature journal is that authors are required to make materials, data and associated protocols promptly available to readers without preconditions	A condition of publication in a Nature journal is that authors are required to make materials, data and associated protocols promptly available to readers without preconditions	A condition of publication in a Nature journal is that authors are required to make materials, data and associated protocols promptly available to readers without preconditions	A condition of publication in a Nature journal is that authors are required to make materials, data and associated protocols promptly available to readers without preconditions	A condition of publication in a Nature journal is that authors are required to make materials, data and associated protocols promptly available to readers without preconditions	.	A condition of publication in a Nature journal is that authors are required to make materials, data and associated protocols promptly available to readers without preconditions	.
Neuron	Nucleic acid and protein sequences and microarray data must be deposited in the appropriate public database and must be accessible without restriction from the date of publication. An entry name or accession number must be included	Nucleic acid and protein sequences and microarray data must be deposited in the appropriate public database and must be accessible without restriction from the date of publication. An entry name or accession number must be included	Nucleic acid and protein sequences and microarray data must be deposited in the appropriate public database and must be accessible without restriction from the date of publication. An entry name or accession number must be included	Publication of a research article in Neuron is taken to imply that the authors are prepared to distribute freely to academic researchers for their own use any materials (e.g., cells, DNA, antibodies) used in the published experiments.	Macromolecular structure (x-ray, NMR, electron micropscopy) data must be deposited in the appropriate public database	.	Authors are encouraged to contribute additional information to the appropriate databases	.
New England Journal of Medicine	For studies containing microarrays, provide the accession numbers and repository name	.	.	.	.	.	.	.
Plant Cell	.	.	.	Publication in The Plant Cell requires that authors make available all materials integral to the reported results (i.e., necessary to support the major claims and enable their verification or replication) for non-commercial research purposes.	.	.	.	.
PLoS Biology	All appropriate datasets, images, and information should be deposited in public resources. Please provide the relevant accession numbers	All appropriate datasets, images, and information should be deposited in public resources. Please provide the relevant accession numbers	All appropriate datasets, images, and information should be deposited in public resources. Please provide the relevant accession numbers	.	All appropriate datasets, images, and information should be deposited in public resources. Please provide the relevant accession numbers	.	All appropriate datasets, images, and information should be deposited in public resources. Please provide the relevant accession numbers	.
PLoS Genetics	Data from the experiments must be deposited in a publicly accessible database.	Data for which public repositories have been established that are in general use should be deposited before publication, and the appropriate accession numbers or digital object identifiers published with the paper	Data for which public repositories have been established that are in general use should be deposited before publication, and the appropriate accession numbers or digital object identifiers published with the paper	Publication is conditional upon the agreement of authors to make freely available any materials and information associated with their publication that are reasonably requested by others for the purpose of academic, noncommercial research	Data for which public repositories have been established that are in general use should be deposited before publication, and the appropriate accession numbers or digital object identifiers published with the paper	.	Publication is conditional upon the agreement of authors to make freely available any materials and information associated with their publication that are reasonably requested by others for the purpose of academic, noncommercial research	.
PLoS Medicine	All appropriate datasets, images, and information should be deposited in public resources. Please provide the relevant accession numbers	All appropriate datasets, images, and information should be deposited in public resources. Please provide the relevant accession numbers	All appropriate datasets, images, and information should be deposited in public resources. Please provide the relevant accession numbers	.	All appropriate datasets, images, and information should be deposited in public resources. Please provide the relevant accession numbers	.	All appropriate datasets, images, and information should be deposited in public resources. Please provide the relevant accession numbers	.
PLoS Pathogens	Data from the experiments must be deposited in a publicly accessible database.	Data for which public repositories have been established that are in general use should be deposited before publication, and the appropriate accession numbers or digital object identifiers published with the paper	Data for which public repositories have been established that are in general use should be deposited before publication, and the appropriate accession numbers or digital object identifiers published with the paper	Publication is conditional upon the agreement of authors to make freely available any materials and information associated with their publication that are reasonably requested by others for the purpose of academic, noncommercial research	Data for which public repositories have been established that are in general use should be deposited before publication, and the appropriate accession numbers or digital object identifiers published with the paper	.	Publication is conditional upon the agreement of authors to make freely available any materials and information associated with their publication that are reasonably requested by others for the purpose of academic, noncommercial research	.
PNAS	Before publication, authors must deposit large data sets (including microarray data, protein or nucleic acid sequences, and atomic coordinates for macromolecular structures) in an approved database and provide an accession number for inclusion in the published paper	Before publication, authors must deposit large data sets (including microarray data, protein or nucleic acid sequences, and atomic coordinates for macromolecular structures) in an approved database and provide an accession number for inclusion in the published paper	Before publication, authors must deposit large data sets (including microarray data, protein or nucleic acid sequences, and atomic coordinates for macromolecular structures) in an approved database and provide an accession number for inclusion in the published paper	Authors must make Unique Materials (e.g., cloned DNAs; antibodies; bacterial, animal, or plant cells; viruses; and computer programs) promptly available on request by qualified researchers for their own use	Before publication, authors must deposit large data sets (including microarray data, protein or nucleic acid sequences, and atomic coordinates for macromolecular structures) in an approved database and provide an accession number for inclusion in the published paper	.	To allow others to replicate and build on work published in PNAS, authors must make materials, data, and associated protocols available to readers	.
Science	Before publication, large data sets (including microarray data, protein or DNA sequences, and atomic coordinates or electron microscopy maps for macromolecular structures) must be deposited in an approved database and an accession number provided for inclusion in the published paper.	Before publication, large data sets (including microarray data, protein or DNA sequences, and atomic coordinates or electron microscopy maps for macromolecular structures) must be deposited in an approved database and an accession number provided for inclusion in the published paper.	Before publication, large data sets (including microarray data, protein or DNA sequences, and atomic coordinates or electron microscopy maps for macromolecular structures) must be deposited in an approved database and an accession number provided for inclusion in the published paper.	After publication, all reasonable requests for materials must be fulfilled	Before publication, large data sets (including microarray data, protein or DNA sequences, and atomic coordinates or electron microscopy maps for macromolecular structures) must be deposited in an approved database and an accession number provided for inclusion in the published paper.	.	After publication, all data necessary to understand, assess, and extend the conclusions of the manuscript must be available to any reader of Science	.
