# Supplementary material for: Public Availability of Published Research Data in High-Impact Journals
Source: PLoS One. 2011 Sep 7;6(9):e24357. doi: 10.1371/journal.pone.0024357 (PMC3168487; doi:10.1371/journal.pone.0024357)
Supplement: Appendix S2 — Summary of extracted data from the 500 papers reviewed for the present analysis. (XLS) [file pone.0024357.s002.xls]

## Sheet: Sheet1
ID	Journal	First Author	First Author Country	First Author USA	Corresponding Author	Corresponding Author Country	Corresponding Author USA	Year	US Govt Funding	Funding	Industry Only Funding	Title	Journal with a Policy	Adherence to Journal Policy	Raw Data Available	Microarray Data
1	American Journal of Human Genetics	Bing He	Sweden	0	Karl Tryggvason	Sweden	0	2009	0	Foundations of Novo Nordisk, Knut and Alice Wallenberg, Söderberg and Hedlund, the Swedish Medical Research Council, the Swedish Foundation for Strategic Research, the Swedish Diabetes Association, the Sigrid Juselius Foundation, the Academy of Finland	0	Association of Genetic Variants at 3q22 with Nephropathy in Patients with Type 1 Diabetes Mellitus	yes	yes	given	deposited
2	American Journal of Human Genetics	Hasbaira Bolor	Japan	0	Hiroki Kurahashi	Japan	0	2009	0	Grant-in-Aid for Scientific Research from the Ministry of Education, Culture, Sports, Science, and Technology of Japan	0	Mutations of the SYCP3 Gene in Women with Recurrent Pregnancy Loss	yes	yes	not given	deposited
3	American Journal of Human Genetics	Pei-Lung Chen	USA	1	David Valle	USA	1	2009	1	NIH, National Institutes of Mental Health	0	Fine Mapping on Chromosome 10q22-q23 Implicates Neuregulin 3 in Schizophrenia	yes	yes	given	deposited
4	American Journal of Human Genetics	Gary W. Beecham	USA	1	Margaret A. Pericak-Vance	USA	1	2009	1	National Institute on Aging , NIH, National Institute of Neurological Disorders and Stroke , Alzheimer's Association	0	Genome-wide Association Study Implicates a Chromosome 12 Risk Locus for Late-Onset Alzheimer Disease	yes	no	not given	not deposited
5	American Journal of Human Genetics	Derek E. Neilson	USA	1	Derek E. Neilson	USA	1	2009	1	NIH, Burroughs Wellcome Fund, and by the Howard Hughes Medical Institute	0	Infection-Triggered Familial or Recurrent Cases of Acute Necrotizing Encephalopathy Caused by Mutations in a Component of the Nuclear Pore, RANBP2	yes	yes	given	deposited
6	American Journal of Human Genetics	Juan Manuel Rosa-Rosa	Spain	0	Javier Benítez	Spain	0	2009	0	Ministerio de Educacion y Ciencia and from Carlos III Health Institute	0	Genome-wide Linkage Scan Reveals Three Putative Breast-Cancer-Susceptibility Loci	yes	no	not given	not deposited
7	American Journal of Human Genetics	Luigi Ferrucci	USA	1	Luigi Ferrucci	USA	1	2009	1	This research was supported in part by the Intramural Research Program of the National Institute on Aging, National Institutes of Health. A portion of that support was through an R&D contract with the MedStar Research Institute.	0	Common Variation in the β-Carotene 15,15-Monooxygenase 1 Gene Affects Circulating Levels of Carotenoids: A Genome-wide Association Study	yes	yes	not given	deposited
8	American Journal of Human Genetics	Piya Lahiry	Canada	0	Robert A. Hegele	Canada	0	2009	0	CIHR (CTP-79853, MOP-37854), the Heart and Stroke Foundation of Ontario, Genome Canada through the Ontario Genomics Institute, and grants from the Children's Health Research Institute, the Lawson Health Research Institute, and the Garrod Association	0	A Multiplex Human Syndrome Implicates a Key Role for Intestinal Cell Kinase in Development of Central Nervous, Skeletal, and Endocrine Systems	yes	yes	not given	deposited
9	American Journal of Human Genetics	Andy Itsara	USA	1	Evan E. Eichler	USA	1	2009	1	Intramural Research Program of the National Institute on Aging, National Institutes of Health, Department of Health and Human Services	0	Population Analysis of Large Copy Number Variants and Hotspots of Human Genetic Disease	yes	yes	not given	deposited
10	American Journal of Human Genetics	Giulio Piluso	Italy	0	Giulio Piluso	Italy	0	2009	1	NICHD (HD 26202) and a grant from the South Carolina Department of Disabilities and Special Needs and telethon	0	A Missense Mutation in CASK Causes FG Syndrome in an Italian Family	yes	yes	not given	deposited
1	American Journal of Psychiatry	jeffrey A bridge	USA	1	jeffrey A bridge	USA	1	2009	1	NIMH	0	Placebo Response in Randomized Controlled Trials of Antidepressants for Pediatric Major Depressive Disorder	no	no policy	not given	NA
2	American Journal of Psychiatry	karestan C koenan	USA	1	karestan C koenan	USA	1	2009	0	dunedin multidisciplinary health and dev research unti from new zealand health research council	0	Childhood IQ and Adult Mental Disorders: A Test of the Cognitive Reserve Hypothesis	no	no policy	not given	NA
3	American Journal of Psychiatry	philip shaw	USA	1	philip shaw	USA	1	2009	1	NIH Intramural Research Program	0	Psychostimulant Treatment and the Developing Cortex in Attention Deficit Hyperactivity Disorder	no	no policy	not given	NA
4	American Journal of Psychiatry	erika e forbes	USA	1	erika e forbes	USA	1	2009	1	NIMH program project grant	0	Altered Striatal Activation Predicting Real-World Positive Affect in Adolescent Major Depressive Disorder	no	no policy	not given	NA
5	American Journal of Psychiatry	anqi qui	Singapore	0	anqi qui	Singapore	0	2009	0	national university of singapore grant	0	Basal Ganglia Volume and Shape in Children With Attention Deficit Hyperactivity Disorder	no	no policy	not given	NA
6	American Journal of Psychiatry	Katya Rubia	UK	0	katya rubia	UK	0	2009	0	Medical Research Council (G9900839) and The Wellcome Trust	0	Disorder-Specific Dissociation of Orbitofrontal Dysfunction in Boys With Pure Conduct Disorder During Reward and Ventrolateral Prefrontal Dysfunction in Boys With Pure ADHD During Sustained Attention	no	no policy	not given	NA
7	American Journal of Psychiatry	Alice P. Jones	UK	0	Essi Viding	UK	0	2009	0	Medical Research Council, Department of Health Forensic Mental Health Programme	0	Amygdala Hypoactivity to Fearful Faces in Boys With Conduct Problems and Callous-Unemotional Traits	no	no policy	not given	NA
8	American Journal of Psychiatry	Jacques Baillargeon	USA	1	Jacques Baillargeon	USA	1	2009	0	no funding	0	Psychiatric Disorders and Repeat Incarcerations: The Revolving Prison Door	no	no policy	not given	NA
9	American Journal of Psychiatry	Mark A. Frye	USA	1	MARK A FRYE	USA	1	2009	0	Stanley Medical Research Institute. Drug and matching placebo for the antidepressant clinical trial was supplied by GlaxoSmithKline (bupropion), Pfizer US Pharmaceuticals (sertraline), and Wyeth Pharmaceuticals (venlafaxine).	0	Correlates of Treatment-Emergent Mania Associated With Antidepressant Treatment in Bipolar Depression	no	no policy	not given	NA
10	American Journal of Psychiatry	Joseph F. Goldberg	USA	1	Joseph F. Goldberg	USA	1	2009	1	NIMH under contract N01 MH-80001	0	Manic Symptoms During Depressive Episodes in 1,380 Patients With Bipolar Disorder: Findings From the STEP-BD	no	no policy	not given	NA
1	American Journal of Respiratory and Critical Care Medicine	DAVID W DENNING	UK	0	david w denning	UK	0	2009	0	Molton Trust, a U.K. charity	0	Randomized Controlled Trial of Oral Antifungal Treatment for Severe Asthma with Fungal Sensitization	yes	no	not given	NA
2	American Journal of Respiratory and Critical Care Medicine	paul M o BYRNE	Canada	0	paul m o byrne	Canada	0	2009	0	astrazeneca RND sweden	1	Severe Exacerbations and Decline in Lung Function in Asthma	yes	does not apply	not given	NA
3	American Journal of Respiratory and Critical Care Medicine	ERIK J SAUDE	Canada	0	darryl j adamko	Canada	0	2009	0	Sick Kids Foundation, AllerGen, the Alberta Heritage Foundation for Medical Research, and the Canadian Institutes for Health Research	0	Metabolic Biomarkers in a Model of Asthma Exacerbation	yes	does not apply	not given	NA
4	American Journal of Respiratory and Critical Care Medicine	hiroshi iwamoto	Japan	0	akihito yokoyama	Japan	0	2009	0	Grants-in-Aid for Scientific Research from the Ministry of Education, Culture, Sports, Science and Technology of Japan	0	Airflow Limitation in Smokers Is Associated with Subclinical Atherosclerosis Airflow Limitation in Smokers Is Associated with Subclinical Atherosclerosis	yes	does not apply	not given	NA
5	American Journal of Respiratory and Critical Care Medicine	HIERONYMOUS Wh van hees	Netherlands	0	M A heunkes	Netherlands	0	2009	0	Grants-in-Aid for Scientific Research from the Ministry of Education, Culture, Sports, Science and Technology of Japan	0	Levosimendan Enhances Force Generation of Diaphragm Muscle from Patients with Chronic Obstructive Pulmonary Disease	yes	does not apply	not given	NA
6	American Journal of Respiratory and Critical Care Medicine	Leah R. Evans	USA	1	Douglas B. White	USA	1	2009	1	National Institutes of Health and the Greenwall Foundation	0	Surrogate Decision-Makers' Perspectives on Discussing Prognosis in the Face of Uncertainty	yes	does not apply	not given	NA
7	American Journal of Respiratory and Critical Care Medicine	Janice Abbott	UK	0	Janice Abbott	UK	0	2009	0	Not listed	0	Can Health-related Quality of Life Predict Survival in Adults with Cystic Fibrosis?	yes	does not apply	not given	NA
8	American Journal of Respiratory and Critical Care Medicine	Hua Jin	Korea	0	Myung-Haing Cho	Korea	0	2009	0	the Ministry of Science and Technology in Korea. M.H.C	0	High Dietary Inorganic Phosphate Increases Lung Tumorigenesis and Alters Akt Signaling	yes	does not apply	not given	NA
9	American Journal of Respiratory and Critical Care Medicine	Gabriella Sozzi	Italy	0	Gabriella Sozzi	Italy	0	2009	0	Associazione Italiana Ricerca Cancro (AIRC) and Lega Italiana Lotta Tumori (LILT)	0	Plasma DNA Quantification in Lung Cancer Computed Tomography Screening Five-Year Results of a Prospective Study	yes	does not apply	not given	NA
10	American Journal of Respiratory and Critical Care Medicine	Nicolas Veziris	France	0	Nicolas Veziris	France	0	2009	0	Johnson & Johnson	1	A Once-Weekly R207910-containing Regimen Exceeds Activity of the Standard Daily Regimen in Murine Tuberculosis	yes	no	not given	NA
1	Annals of Internal Medicine	nancy N baxter	Canada	0	nancy N baxter	Canada	0	2009	0	Canadian Institutes of Health Research and American Society of Clinical Oncology	0	Association of Colonoscopy and Death From Colorectal Cancer	yes	yes	not given	NA
2	Annals of Internal Medicine	david D dore	USA	1	david D dore	USA	1	2009	1	Department of Veterans Affairs, Agency for Healthcare Research and Quality, American Cancer Society, and National Institutes of Health	0	Association Between Statin Use and Risk for Keratinocyte Carcinoma in the Veterans Affairs Topical Tretinoin Chemoprevention Trial	yes	yes	not given	NA
3	Annals of Internal Medicine	mario venditti	Italy	0	mario venditti	Italy	0	2009	0	none	0	Outcomes of Patients Hospitalized With Community-Acquired, Health Care–Associated, and Hospital-Acquired Pneumonia	yes	yes	not given	NA
4	Annals of Internal Medicine	smita K baid	USA	1	karel pacek	USA	1	2009	1	Eunice Kennedy Shriver National Institute of Child Health and Development, National Institutes of Health	0	Brief Communication: Radiographic Contrast Infusion and Catecholamine Release in Patients With Pheochromocytoma	yes	yes	not given	NA
5	Annals of Internal Medicine	Nina P. Paynter	USA	1	Nina P. Paynter	USA	1	2009	1	National Heart, Lung, and Blood Institute and National Cancer Institute; Donald W. Reynolds Foundation	0	Cardiovascular Disease Risk Prediction With and Without Knowledge of Genetic Variation at Chromosome 9p21.3	yes	yes	not given	not deposited
6	Annals of Internal Medicine	mark H eckman	USA	1	mark H eckman	USA	1	2009	1	The National Institute of Diabetes and Digestive and Kidney Diseases; National Heart, Lung, and Blood Institute; Foundation for Informed Medical Decision Making; National Institutes of Neurological Disorders and Stroke; Deane Institute for Integrative Study of Atrial Fibrillation and Stroke; and American Heart Association.	0	Cost-Effectiveness of Using Pharmacogenetic Information in Warfarin Dosing for Patients With Nonvalvular Atrial Fibrillation	yes	yes	not given	NA
7	Annals of Internal Medicine	Karim El Harchaoui	Netherlands	0	Karim El Harchaoui	Netherlands	0	2009	0	Medical Research Council and Cancer Research UK, with additional support from the European Union, Stroke Association, British Heart Foundation, United Kingdom Department of Health, Food Standards Agency, and the Wellcome Trust.	0	High-Density Lipoprotein Particle Size and Concentration and Coronary Risk	yes	yes	not given	NA
8	Annals of Internal Medicine	Claire Vanlemmens	France	0	vincent d martino	France	0	2009	0	French National Program for Clinical Research	0	Immediate Listing for Liver Transplantation Versus Standard Care for Child–Pugh Stage B Alcoholic Cirrhosis: A Randomized Trial	yes	yes	not given	NA
9	Annals of Internal Medicine	sabrina hundt	Germany	0	ulrike haug	Germany	0	2009	0	German Research Foundation	0	Comparative Evaluation of Immunochemical Fecal Occult Blood Tests for Colorectal Adenoma Detection	yes	yes	not given	NA
10	Annals of Internal Medicine	giancarlo marenzi	Italy	0	giancarlo marinzi	Italy	0	2009	0	Centro Cardiologico Monzino, Institute of Cardiology, University of Milan, Milan, Italy.	0	Contrast Volume During Primary Percutaneous Coronary Intervention and Subsequent Contrast-Induced Nephropathy and Mortality	yes	yes	not given	NA
1	Annals of Neurology	robert g miller	USA	1	robert g miller	USA	1	2009	0	Rhone-Poulenc Rorer Pharmaceuticals Inc, World Federation of Neurology, ALS association	0	Brain metabolism in rett syndrome: Age, clinical, and genotype correlations	no	no policy	not given	NA
2	Annals of Neurology	Linda S. de Vries	Netherlands	0	Linda S. de Vries	Netherlands	0	2009	0	no funding	0	COL4A1 mutation in two preterm siblings with antenatal onset of parenchymal hemorrhage	no	no policy	not given	not deposited
3	Annals of Neurology	Coro Paisan-Ruiz	USA	1	Kailash P. Bhatia	UK	0	2009	1	NIH, Intramural Research Program of the National Institute on Aging, Department of Health and Human Services,Bachmann Strauss Foundation, Brain Research Trust, United Kingdom	0	Characterization of PLA2G6 as a locus for dystonia-parkinsonism	no	no policy	not given	not deposited
4	Annals of Neurology	Alexander Kellner	Germany	0	Markus Glatzel	Germany	0	2009	0	Thyssen Foundation, Hans und Ilse Breuer Foundation	0	Autoantibodies against beta-amyloid are common in Alzheimer's disease and help control plaque burden	no	no policy	not given	NA
5	Annals of Neurology	Michael H. Bar	Austrailia	0	John W. Prineas	Austrailia	0	2009	0	National Health and Medical Research Council of Australia, Multiple Sclerosis Research Australia, Nerve Research Foundation, University of Sydney, New South Wales Ministry for Science and Medical Research, Royal Prince Alfred Hospital/Biogen-Idec Neuroimmunology Fellowship	0	Immunoglobulins and complement in postmortem multiple sclerosis tissue	no	no policy	not given	not deposited
6	Annals of Neurology	Mahasweta Girgenrath	USA	1	Jeffrey Boone Miller	USA	1	2009	1	Muscular Dystrophy Association of the U.S.A. NIDMS; Grant Number: AR049496 NHLBI; Grant Number: HL064641	0	Pathology is alleviated by doxycycline in a laminin-2-null model of congenital muscular dystrophy	no	no policy	not given	not deposited
7	Annals of Neurology	Tibor Auer	Hungary	0	Jozsef Janszky	Hungary	0	2009	0	Bolyai Fellowship Habilitas Scholarship MFB Hungarian Neuroimaging Foundation Hungarian Medical Research Council; Grant Number: ETT 219/2006, ETT 176/2006 Hungarian Research Fund; Grant Number: OTKA-NKTH F68720	0	Does obstetric brachial plexus injury influence speech dominance?	no	no policy	not given	NA
8	Annals of Neurology	Jindrich Soltys	USA	1	Henry J. Kaminski	USA	1	2009	1	NIH NEI, National Eye Institute; Grant Number: R24EY014837 Parasitological Institute of the Slovak Academy of Sciences Slovak Grant Agency VEGA; Grant Number: 2/7186 Research to Prevent Blindness Challenge departmental	0	Novel complement inhibitor limits severity of experimentally myasthenia gravis	no	no policy	not given	NA
9	Annals of Neurology	Xiang Gao	USA	1	Xiang Gao	USA	1	2009	1	NIH (National Institute of Neurological Diseases and Stroke); Grant Number: R01 NS048517 Parkinson Study Group Mentored Clinical Research Award	0	Genetic determinants of hair color and parkinson's disease risk	no	no policy	not given	not deposited
10	Annals of Neurology	Duygu Selcen	USA	1	Andrew G. Engel	USA	1	2009	1	NIH/NINDS	0	Mutation in BAG3 causes severe dominant childhood muscular dystrophy	no	no policy	not given	not deposited
1	Archives of General Psychiatry	Oliver D. Howes	USA	1	Oliver D. Howes	USA	1	2009	0	Medical Research Council ,Research Trust ,Guy's and St Thomas' Charitable Fund	0	Elevated Striatal Dopamine Function Linked to Prodromal Signs of Schizophrenia	yes	does not apply	not given	NA
2	Archives of General Psychiatry	Carl Ernst	Canada	0	Gustavo Turecki	Canada	0	2009	0	none	0	Alternative Splicing, Methylation State, and Expression Profile of Tropomyosin-Related Kinase B in the Frontal Cortex of Suicide completers	yes	no	not given	not deposited
3	Archives of General Psychiatry	Eric Fakra	USA	1	Ahmad R. Hariri	USA	1	2009	1	NIH, NARSAD Young Investigator Award	0	Effects of HTR1A C(–1019)G on Amygdala Reactivity and Trait Anxiety	yes	no	not given	not deposited
4	Archives of General Psychiatry	Andreas Reif	Germany	0	Andreas Reif	Germany	0	2009	0	German Research Foundation, Federal Ministry of Education and Research ,the European Commission	0	Influence of Functional Variant of Neuronal Nitric Oxide Synthase on Impulsive Behaviors in Humans	yes	no	not given	not deposited
5	Archives of General Psychiatry	Rachel Marsh	USA	1	Rachel Marsh	USA	1	2009	1	NIH, National Alliance for Research on Schizophrenia and Depression,the Sackler Institute for Developmental Psychobiology,Columbia University	0	Deficient Activity in the Neural Systems That Mediate Self-regulatory Control in Bulimia Nervosa	yes	does not apply	not given	NA
6	Archives of General Psychiatry	marco battaglia	Italy	0	marco battaglia	Italy	0	2009	0	National Alliance for Research in Schizophrenia and Depression Independent Investigator Award (Dr Battaglia) and the Norwegian Foundation of Health and Rehabilitation	0	A Genetically Informed Study of the Association Between Childhood Separation Anxiety, Sensitivity to CO2, Panic Disorder, and the Effect of Childhood Parental Loss	yes	does not apply	not given	NA
7	Archives of General Psychiatry	christine heim	USA	1	christine heim	USA	1	2009	1	centres for disease control and prevention	0	Childhood Trauma and Risk for Chronic Fatigue Syndrome Association With Neuroendocrine Dysfunction Childhood Trauma and Risk for Chronic Fatigue Syndrome Association With Neuroendocrine Dysfunction	yes	does not apply	not given	NA
8	Archives of General Psychiatry	gary w small	USA	1	gary w small	USA	1	2009	1	NIH and Department of Energy; the Rotary CART Fund; the Fran and Ray Stark Foundation Fund for Alzheimer's Disease Research; the Ahmanson Foundation; the Larry L. Hillblom Foundation	0	Influence of Cognitive Status, Age, and APOE-4 Genetic Risk on Brain FDDNP Positron-Emission Tomography Imaging in Persons Without Dementia	yes	no	not given	not deposited
9	Archives of General Psychiatry	david h epstein	USA	1	david h epstein	USA	1	2009	1	Intramural Research Program of the National Institute on Drug Abuse, National Institutes of Health	0	Real-Time Electronic Diary Reports of Cue Exposure and Mood in the Hours Before Cocaine and Heroin Craving and Use	yes	does not apply	not given	NA
10	Archives of General Psychiatry	paolo fusar-poli	UK	0	paolo fusar-poli	UK	0	2009	0	Psychiatry Research Trust, London, England.	0	Distinct Effects of 9-Tetrahydrocannabinol and Cannabidiol on Neural Activation During Emotional Processing	yes	does not apply	not given	NA
1	Blood	Massimo Di Nicola1	Italy	0	Massimo Di Nicola1	Italy	0	2009	0	research funding by the Associazione Italiana per la Ricerca sul Cancro (AIRC, Milan, Italy) and Fondazione Michelangelo (Milan, Italy) (M.D.N.).	0	Vaccination with autologous tumor-loaded dendritic cells induces clinical and immunologic responses in indolent B-cell lymphoma patients with relapsed and measurable disease: a pilot study	yes	no	not given	NA
2	Blood	Mikkael A. Sekeres1	USA	1	Mikkael A. Sekeres1	USA	1	2009	1	NIH	0	Time from diagnosis to treatment initiation predicts survival in younger, but not older, acute myeloid leukemia patients	yes	no	not given	NA
3	Blood	Wolfgang W. Leitner1	USA	1	mark c uday	USA	1	2009	1	NIH, Intramural Research Program of the National Institutes of Health, National Cancer Institute, and Center for Cancer Research.	0	Enhancement of DNA tumor vaccine efficacy by gene gun–mediated codelivery of threshold amounts of plasmid-encoded helper antigen	yes	no	not given	not deposited
4	Blood	bin zhang	China	0	Robert C. H. Zhao	China	0	2009	0	National Natural Science Foundation of China , Beijing Ministry of Science and Technology , the Cheung Kong Scholars program, Projects of the Ministry of Science and Technology of China	0	Mesenchymal stem cells induce mature dendritic cells into a novel Jagged-2–dependent regulatory dendritic cell population	yes	no	not given	not deposited
5	Blood	Alberto Bosque	USA	1	Vicente Planelles	USA	1	2009	1	NIH	0	Induction of HIV-1 latency and reactivation in primary memory CD4+ T cells	yes	yes	not given	NA
6	Blood	María Mittelbrunn	Spain	0	Francisco Sánchez-Madrid	Spain	0	2009	0	Ministerio de Educación y Ciencia, Ayuda a la Investigación Básica 2002 from Juan March Foundation and European Network MAIN LSHG-CT-2003-502935 and Red Temática de Investigación cooperativa en Enfermedades Cardiovasculares RD06/0014-0030 (F.S.-M.). G.M.d.H. was supported by Instituto de Salud Carlos III. Centro Nacional de Investigaciones Cardiovasculares is supported by the Spanish Ministry of …	0	Imaging of plasmacytoid dendritic cell interactions with T cells	yes	no	not given	not deposited
7	Blood	Gabriela Zenhaeusern	Switzerland	0	Christoph Hess	Switzerland	0	2009	0	Swiss National Science Foundation	0	A high-mobility, low-cost phenotype defines human effector-memory CD8+ T cells	yes	yes	not given	NA
8	Blood	Sarina Sulong1	UK	0	Anthony V. Moorman	UK	0	2009	0	Not listed	0	A comprehensive analysis of the CDKN2A gene in childhood acute lymphoblastic leukemia reveals genomic deletion, copy number neutral loss of heterozygosity, and association with specific cytogenetic subgroups	yes	no	not given	not deposited
9	Blood	Toshiki Ochi1	Japan	0	Masaki Yasukawa	Japan	0	2009	0	Ministry of Education, Culture, Sports, Science and Technology of Japan; a Grant-in-Aid for Cancer Research (no. 19-14) from the Ministry of Health, Labor and Welfare; and from the Uehara Memorial Foundation.	0	Aurora-A kinase: a novel target of cellular immunotherapy for leukemia Aurora-A kinase: a novel target of cellular immunotherapy for leukemia	yes	no	not given	not deposited
10	Blood	Joshua D. Brody1	USA	1	Ronald Levy	USA	1	2009	1	National Institute of Health (CA-34233, CA-33399, CA-49605) and by a Career Development Award from the Lymphoma Research Foundation	0	Immunotransplantation preferentially expands T-effector cells over T-regulatory cells and cures large lymphoma tumors	yes	yes	not given	NA
1	British Medical Journal	Alastair Gray	UK	0	Alastair Gray	UK	0	2009	0	Cancer Research UK, Medical Research Council	0	Lung cancer deaths from indoor radon and the cost effectiveness and potential of policies to reduce them	yes	no	not given	NA
2	British Medical Journal	Anna L Ford	USA	1	J P H Shield	USA	1	2009	0	BUPA Foundation	0	Impact of pulse oximetry screening on the detection of duct dependent congenital heart disease: a Swedish prospective screening study in 39 821 newborns	yes	no	not given	NA
3	British Medical Journal	Clare F Heal	Austrailia	0	Clare F Heal	Austrailia	0	2009	0	Chris Silagy scholarship from the Royal Australian College of General Practice	0	Use of Framingham risk score and new biomarkers to predict cardiovascular mortality in older people: population based observational cohort study	yes	no	not given	NA
4	British Medical Journal	C-L Dennis	Canada	0	C-L Dennis	Canada	0	2009	0	Canadian Institutes of Health Research	0	Does single application of topical chloramphenicol to high risk sutured wounds reduce incidence of wound infection after minor surgery? Prospective randomised placebo controlled double blind trial	yes	no	not given	NA
5	British Medical Journal	C Jane Morrell	UK	0	C Jane Morrell	UK	0	2009	0	NHS research and development health technology assessment programme	0	Clinical effectiveness of health visitor training in psychologically informed approaches for depression in postnatal women: pragmatic cluster randomised trial in primary care	yes	no	not given	NA
6	British Medical Journal	C-L Dennis	Canada	0	C-L Dennis	Canada	0	2009	0	the Canadian Institutes of Health Research	0	Comparing hospital and telephone follow-up after treatment for breast cancer: randomised equivalence trial	yes	no	not given	NA
7	British Medical Journal	Kinta Beaver	UK	0	Kinta Beaver	UK	0	2009	0	the Medical Research Council (UK) and a project grant from Rosemere Cancer Foundation (UK	0	Effect of peer support on prevention of postnatal depression among high risk women: multisite randomised controlled trial	yes	no	not given	NA
8	British Medical Journal	Amber Rithalia	UK	0	Catriona McDaid	UK	0	2009	0	NIHR Health Technology Assessment Programme	0	Impact of presumed consent for organ donation on donation rates: a systematic review	yes	does not apply	not given	NA
9	British Medical Journal	Min Zhang	Austrailia	0	Min Zhang	Austrailia	0	2009	0	the National Health and Medical Research Council	0	Comorbidity and repeat admission to hospital for adverse drug reactions in older adults: retrospective cohort study	yes	no	not given	NA
10	British Medical Journal	Ian Colman	Canada	0	Ian Colman	Canada	0	2009	1	Medical Research Council, NIH, Wellcome trust	0	Outcomes of conduct problems in adolescence: 40 year follow-up of national cohort	yes	no	not given	NA
1	Cell	J. Muse Davis	USA	1	Lalita Ramakrishnan	USA	1	2009	1	NIH, Burroughs Wellcome Foundation, American Society for Engineering Education	0	The Role of the Granuloma in Expansion and Dissemination of Early Tuberculous Infection	yes	no	not given	NA
2	Cell	Shang Li	USA	1	Elizabeth H. Blackburn	USA	1	2009	1	NIH, University of California	0	Cdk1-Dependent Phosphorylation of Cdc13 Coordinates Telomere Elongation during Cell-Cycle Progression	yes	yes	given
3	Cell	Tiara L.A. Kawahara	USA	1	Katrin F. Chua	USA	1	2009	1	NIH, Department of Veterans Affairs Merit Review, Stanford Graduate Fellowship, California Breast Cancer Research Program, American Cancer Society	0	SIRT6 Links Histone H3 Lysine 9 Deacetylation to NF-κB-Dependent Gene Expression and Organismal Life Span	yes	no	not given	deposited
4	Cell	Jinju Han	Korea	0	V. Narry Kim	Korea	0	2009	1	Ministry of Education, Science, and Technology of Korea. Danish Medical Research Council. University of California, San Francisco. Prostate Cancer Foundation. NIH.	0	Posttranscriptional Crossregulation between Drosha and DGCR8	yes	yes	not given	not deposited
5	Cell	Jae-Sung Woo	Korea	0	Byung-Ha Oh	Korea	0	2009	0	Creative Research Initiatives (Center for Biomolecular Interaction) of MOST/KOSEF and partly by Core Research Program of POSTECH. J.-H.L., M.-K.S., H.-C.S., B.K. and K.-H.L. were supported by the Brain Korea 21 Project. This study made use of the beamline 4A at the Pohang Accelerator Laboratory in Korea, the beamline BL-5A at Photon Factory in Japan and the Brookhaven National Laboratory/Biology …	0	Structural Studies of a Bacterial Condensin Complex Reveal ATP-Dependent Disruption of Intersubunit Interactions	yes	no	not given	NA
6	cell	suraj saksena	USA	1	Arthur E johnson	USA	1	2009	1	NIH and Robert A. Welch Foundation and Weill Institute for Cell and Molecular Biology	0	Functional Reconstitution of ESCRT-III Assembly and Disassembly	yes	no	not given	NA
7	Cell	jared C cochren	USA	1	F. Jon Kull	USA	1	2009	1	NIH and AHA	0	ATPase Cycle of the Nonmotile Kinesin NOD Allows Microtubule End Tracking and Drives Chromosome Movement	yes	no	not given	NA
8	Cell	sirio dupont	Italy	0	Stefano Piccolo	Italy	0	2009	0	TELETHON-Italy (GGP07218), Cariparo Foundation Excellence Grant, ASI, and Swissbridge grants (to S.P.), and by an AIRC grant	0	FAM/USP9x, a Deubiquitinating Enzyme Essential for TGFβ Signaling, Controls Smad4 Monoubiquitination	yes	no	not given	NA
9	Cell	sona pandey	USA	1	sarah assmann	USA	1	2009	1	UW College of Agricultural and Life Sciences, the Morgridge family, and an NIH Graduate Fellowship Training Grant and NSF grant	0	Two Novel GPCR-Type G Proteins Are Abscisic Acid Receptors in Arabidopsis	yes	no	not given	not deposited
10	Cell	richaRD benton	USA	1	Leslie B. Vosshall	USA	1	2009	1	Foundation for the National Institutes of Health through the Grand Challenges in Global Health Initiative and MacKnight endowment fund.	0	Variant Ionotropic Glutamate Receptors as Chemosensory Receptors in Drosophila	yes	no	not given	not deposited
1	Circulation	david h lau	USA	1	micheal R rosen	USA	1	2009	1	United States Public Health Service-National Heart, Lung, and Blood Institute grants	0	Epicardial Border Zone Overexpression of Skeletal Muscle Sodium Channel SkM1 Normalizes Activation, Preserves Conduction, and Suppresses Ventricular Arrhythmia: An In Silico, In Vivo, In Vitro Study	yes	no	not given	not deposited
2	Circulation	koichi sugamora	Japan	0	Seigo Sugiyama	Japan	0	2009	0	Ministry of Education, Science, and Culture in Japan	0	Activated Endocannabinoid System in Coronary Artery Disease and Antiinflammatory Effects of Cannabinoid 1 Receptor Blockade on Macrophages	yes	no	not given	NA
3	Circulation	wolfgang lieb	USA	1	Ramachandran S. Vasan	USA	1	2009	1	National Institutes of Health/National Heart, Lung, and Blood Institute	0	Multimarker Approach to Evaluate Correlates of Vascular Stiffness: The Framingham Heart Study	yes	no	not given	NA
4	Circulation	satish kenchaiah	USA	1	satish kenchaiah	USA	1	2009	1	National Heart, Lung, and Blood Institute	0	Body Mass Index and Vigorous Physical Activity and the Risk of Heart Failure Among Men	yes	no	not given	NA
5	Circulation	brian williams	UK	0	brian williams	UK	0	2009	0	Pfizer UK	1	Impact of Statin Therapy on Central Aortic Pressures and Hemodynamics: Principal Results of the Conduit Artery Function Evaluation–Lipid-Lowering Arm (CAFE-LLA) Study	yes	no	not given	NA
6	Circulation	Wilfried Mullens	USA	1	W.H. Tang	USA	1	2009	1	American Society of Echocardiography Sonographers’ grant and the National Institutes of Health, National Center for Research Resources	0	Tissue Doppler Imaging in the Estimation of Intracardiac Filling Pressure in Decompensated Patients With Advanced Systolic Heart Failure	yes	no	not given	NA
7	Circulation	Antonio Colombo	Italy	0	Antonio Colombo	Italy	0	2009	0	Cordis, a Johnson & Johnson Co	1	Randomized Study of the Crush Technique Versus Provisional Side-Branch Stenting in True Coronary Bifurcations: The CACTUS (Coronary Bifurcations: Application of the Crushing Technique Using Sirolimus-Eluting Stents) Study	yes	no	not given	NA
8	Circulation	Geertje Lewin	Germany	0	Frank Ulrich Müller	Germany	0	2009	0	Deutsche Forschungsgemeinschaft, the Interdiziplinäres Zentrum für Klinische Forschung/Interdisciplinary Centre for Clinical Reseach Münster	0	Critical Role of Transcription Factor Cyclic AMP Response Element Modulator in β1-Adrenoceptor–Mediated Cardiac Dysfunction	yes	no	not given	not deposited
9	Circulation	Giuseppe Rengo	USA	1	Walter J. Koch	USA	1	2009	1	NIH, AHA	0	Myocardial Adeno-Associated Virus Serotype 6–βARKct Gene Therapy Improves Cardiac Function and Normalizes the Neurohormonal Axis in Chronic Heart Failure	yes	no	not given	not deposited
10	Circulation	Wuqiang Zhu	USA	1	Loren J. Field	USA	1	2009	1	National Heart, Lung, and Blood Institute	0	Acute Doxorubicin Cardiotoxicity Is Associated With p53-Induced Inhibition of the Mammalian Target of Rapamycin Pathway	yes	no	not given	not deposited
1	Circulation Research	giordano pula	UK	0	manuel mayr	UK	0	2009	0	british heart foundation and oak foundation	0	Proteomics Identifies Thymidine Phosphorylase As a Key Regulator of the Angiogenic Potential of Colony-Forming Units and Endothelial Progenitor Cell Cultures	yes	yes	given	not deposited
2	Circulation Research	gladys A nigoh	USA	1	steven p jones	USA	1	2009	1	NIH, AHA National Centre Scientist Dev Grant,KSEF.	0	unique hexosaminodase reduces metabolic surviva signal and sensitizes cardiac myocytes to hypoxia reoxygenation inuryu	yes	no	not given	not deposited
3	Circulation Research	Ji-Youn youn	USA	1	hua cai	USA	1	2009	1	National heart, lung and blood institute, AHA, ADA, a aubisch award and startup fund from Uni of california	0	AN Ezrin/calpain/PI3K/AMPK/Enos 5.1179 SIGNALLING CASCADE MEDIATING vegf DEPENDANT ENDOTHELIAL CELLS: POTENTIAL ROLE IN ATHEREOGENESIS.	yes	no	not given	not deposited
4	Circulation Research	WIGGO J SANDBERG	Norway	0	wiggo j sandberg	Norway	0	2009	0	norweign council of cardiovascular research, rersearch council of norway, univ of oslo	0	inflammatory interaction between light and proteinase-activated receptor-2 in endothelial cells	yes	no	not given	not deposited
5	Circulation Research	jeffrey d alexis	USA	1	jeffrey d alexis	USA	1	2009	1	NIH and aha	0	Bcr kinase activation by angiotensin 2 inhibits Peroxisome proliferator activated receptor gamma transcriptional activity in vascular smooth muscle cells	yes	no	not given	not deposited
6	Circulation Research	Damon Poburko	Switzerland	0	Damon Poburko	Switzerland	0	2009	0	Swiss National Science Foundation grant	0	Mitochondrial Regulation of Sarcoplasmic Reticulum Ca2+ Content in Vascular Smooth Muscle Cells	yes	does not apply	not given	NA
7	Circulation Research	Fabrice Jaffré	France	0	Luc Maroteaux	France	0	2009	0	Centre National de la Recherche Scientifique, the Institut National de la Santé et de la Recherche Médicale, the Université Pierre et Marie Curie, and the Université Louis Pasteur and by grants from the Fondation de France, the Fondation pour la Recherche Médicale, the Association pour la Recherche contre le Cancer, the French Ministry of Research	0	Serotonin and Angiotensin Receptors in Cardiac Fibroblasts Coregulate Adrenergic-Dependent Cardiac Hypertrophy	yes	no	not given	not deposited
8	Circulation Research	Lai-Hua Xie	USA	1	James N. Weiss	USA	1	2009	1	NIH/National Heart, Lung, and Blood Institute grants	0	Oxidative Stress–Induced Afterdepolarizations and Calmodulin Kinase II Signaling	yes	yes	not given	NA
9	Circulation Research	Thomas P. Flagg	USA	1	Jeanne M. Nerbonne	USA	1	2009	0	Washington University–Pfizer Biomedical Research Program	0	Ca2+-Independent Alterations in Diastolic Sarcomere Length and Relaxation Kinetics in a Mouse Model of Lipotoxic Diabetic Cardiomyopathy	yes	does not apply	not given	NA
10	Circulation Research	Martina Krüger	Germany	0	Wolfgang A. Linke	Germany	0	2009	0	German Research Foundation	0	Protein Kinase G Modulates Human Myocardial Passive Stiffness by Phosphorylation of the Titin Springs	yes	does not apply	not given	NA
1	Current Biology	uro a parego	Italy	0	antonio torroni	Italy	0	2009	0	Progetti Ricerca Interesse Nazionale 2007 (Italian Ministry of the University) (to R.S., O.S., and A.T.), the Sorenson Molecular Genealogy Foundation	0	Distinctive Paleo-Indian Migration Routes from Beringia Marked by Two Rare mtDNA Haplogroups	yes	no	not given	not deposited
2	Current Biology	Gyorgyi Csankovszki	USA	1	Gyorgyi Csankovszki	USA	1	2009	1	NIH, American Cancer Society Institutional Research Grant , Worcester Foundation for Biomedical Research Biological Sciences Scholars Program at the University of Michigan (to G.C.), and Predoctoral Training in Genetics, NIH	0	Three Distinct Condensin Complexes Control C. elegans Chromosome Dynamics	yes	no	not given	not deposited
3	Current Biology	nicolos minc	USA	1	fred chang	USA	1	2009	1	NIH	0	Establishing New Sites of Polarization by Microtubules	yes	yes	not given	NA
4	Current Biology	Juha Saarikangas	Finland	0	pekka Lappalainen	Finland	0	2009	0	Helsinki Graduate School in Biotechnology and Molecular Biology	0	Molecular Mechanisms of Membrane Deformation by I-BAR Domain Proteins	yes	does not apply	not given	NA
5	Current Biology	kiley seamore	Austrailia	0	andreas bartels	Germany	0	2009	0	Australian Research Council Discovery Project, an Australian Research	0	The Coding of Color, Motion, and Their Conjunction in the Human Visual Cortex	yes	does not apply	not given	NA
6	Current Biology	Guillaume Montagnac	France	0	Philippe Chavrier	France	0	2009	0	GenHomme Network Grant, Association pour la Recherche sur le Cancer	0	ARF6 Interacts with JIP4 to Control a Motor Switch Mechanism Regulating Endosome Traffic in	yes	does not apply	not given	NA
7	Current Biology	Steven M. Markus	USA	1	Wei-Lih Lee	USA	1	2009	0	HHMI Academic Research Internship and a University of Massachusetts	0	Motor- and Tail-Dependent Targeting of Dynein to Microtubule Plus Ends and the Cell Cortex	yes	does not apply	not given	NA
8	Current Biology	Giel G. van Dooren	USA	1	Boris Striepen	USA	1	2009	0	BioFuture-Programm” of the German Ministry of Science and Education (BMBF) and a grant from the National Institutes of Health	0	A Novel Dynamin-Related Protein Has Been Recruited for Apicoplast Fission in Toxoplasma gondii	yes	yes	not given	deposited
9	Current Biology	Manuela S. Breinich	Germany	0	Markus Meissner	Germany	0	2009	0	BioFuture-Programm” (Grant number: 0311897) of the Federal Ministry of Education and Research (BMBF)	0	A Dynamin Is Required for the Biogenesis of Secretory Organelles in Toxoplasma gondii	yes	yes	not given	deposited
10	Current Biology	Jesse C. Gatlin	USA	1	Jesse C. Gatlin	USA	1	2009	1	National Institute of General Medicine grants , National Cancer Institute	0	Spindle Fusion Requires Dynein-Mediated Sliding of Oppositely Oriented Microtubules	yes	no	not given	NA
1	Dev Cell	Jau yi li	USA	1	Jau yi li	USA	1	2009	1	Emerald Foundation, the March of Dimes, and the NIDDK	0	Scara5 is a ferritin receptor mediating non-transferrin iron delivery	yes	no	not given	not deposited
2	Dev Cell	takanori amano	Japan	0	toshihiko shiroishi	Japan	0	2009	0	Ministry of Education, Culture, Sports, Science and Technology of Japan	0	Chromosomal dynamics at the Shh locus: limb bud specific differential regulation of competence and active transcription	yes	no	not given	not deposited
3	Dev cell	angelika doetzlhofer	USA	1	Andrew K groves	USA	1	2009	1	NIH	0	Hey2 regulation by FGF provides a Notch-independent mechanism formantaining pillar cell fate in the organ of corti	yes	no	not given	not deposited
4	Dev cell	Li kun phng	UK	0	holger gerhardt	UK	0	2009	0	Cancer Research UK , Lister Institute of Preventive Medicine	0	Nrarp coordinates endothelial notch and wnt signaling to control vessel density in angiogenesis	yes	no	not given	not deposited
5	Dev Cell	manos mevrakis	USA	1	manos mevrakis	USA	1	2009	0	Medical Research Council	0	PLASMA MEMBRANE POLARITY and compartmentalisation are establishedbefore cellularization in the fly embryo	yes	no	not given	not deposited
6	Dev cell	Anita Kulukian	USA	1	Don W. Cleveland	USA	1	2009	1	NIH	0	Unattached Kinetochores Catalyze Production of an Anaphase Inhibitor that Requires a Mad2 Template to Prime Cdc20 for BubR1 Binding	yes	no	not given	not deposited
7	Dev cell	Liviu A. Malureanu	USA	1	Jan M. van Deursen	USA	1	2009	1	NIH	0	BubR1 N Terminus Acts as a Soluble Inhibitor of Cyclin B Degradation by APC/CCdc20 in Interphase	yes	no	not given	not deposited
8	Dev cell	Fernando Monje-Casas	USA	1	Angelika Amon	USA	1	2009	1	NIH	0	Cell Polarity Determinants Establish Asymmetry in MEN Signaling	yes	no	not given	not deposited
9	Dev cell	Ayse Koca Caydasi	Germany	0	Gislene Pereira	Germany	0	2009	0	Helmholtz association grant (HZ-NG-111) and Marie Curie fellowship (MEXT-CT-2006-042544). A.K.C. is funded by the HZ-NG-111 grant	0	Spindle Alignment Regulates the Dynamic Association of Checkpoint Proteins with Yeast Spindle Pole Bodies	yes	no	not given	not deposited
10	Dev cell	Vincent Mirouse	UK	0	Robert P. Ray	UK	0	2009	0	New Investigator grant from the Biotechnology and Biological Sciences Research Council and by a Research Grant from the Medical Research Council	0	Dystroglycan and Perlecan Provide a Basal Cue Required for Epithelial Polarity during Energetic Stress	yes	no	not given	not deposited
1	Gastroenterology	georgia malamut	France	0	Christophe Cellier	France	0	2009	0	Lymphocoeliaque, Institut National du Cancer	0	presentation and long term follow up of refractory celiac disease: comparison of type1 with type2	yes	does not apply	not given	NA
2	Gastroenterology	ying gao	USA	1	ying gao	USA	1	2009	1	Intramural Research Program of the NIH, NCI, Swedish Cancer Society, Stockholm County Council, and the Karolinska Institutet Foundations	0	increased risk of non hodgkins lymphoma in individuals with celiac disease and a potential familial association	yes	does not apply	not given	NA
3	Gastroenterology	alberto rubio-tapia	USA	1	Joseph A. Murray	USA	1	2009	1	Nih, National Research Service Award/Training Grant in Gastrointestinal Allergy and Immunology	0	clinical staging and survival in refractory celiac disease: a single centre experience	yes	does not apply	not given	NA
4	Gastroenterology	gregory S cooper	USA	1	gregory S cooper	USA	1	2009	0	none	0	outpatient management of nonvariceal upper-gastrointestinal haemorrhage: unexpected mortality in medicare beneficiaries.	yes	does not apply	not given	NA
5	Gastroenterology	Lisa L strate	USA	1	Lisa L strate	USA	1	2009	1	Agency for Healthcare Research and Quality , National cancer institute, National Heart, Lung, and Blood Institute	0	obesity increases the risk of diverticulitis and diverticular beeding	yes	does not apply	not given	NA
6	Gastroenterology	Sarah E. Dubner	USA	1	Mary B. Leonard	USA	1	2009	1	National Center for Research Resources.	0	Longitudinal Assessment of Bone Density and Structure in an Incident Cohort of Children With Crohn's Disease	yes	does not apply	not given	NA
7	Gastroenterology	anna s lok	USA	1	anna s lok	USA	1	2009	1	National Institute of Diabetes and Digestive and Kidney Diseases (contract numbers are listed in Appendix 1); the National Institute of Allergy and Infectious Diseases (NIAID); the National Cancer Institute; the National Center for Minority Health and Health Disparities; General Clinical Research Center grants from the National Center for Research Resources, National Institutes of Health	0	Incidence of Hepatocellular Carcinoma and Associated Risk Factors in Hepatitis C-Related Advanced Liver Disease	yes	does not apply	not given	NA
8	Gastroenterology	Payal Bhardwaj,	India	0	Pramod Kumar Garg	India	0	2009	0	Indian Council of Medical Research	0	A Randomized Controlled Trial of Antioxidant Supplementation for Pain Relief in Patients With Chronic Pancreatitis	yes	does not apply	not given	NA
9	Gastroenterology	Valerio Nobili	Italy	0	Valerio Nobili	Italy	0	2009	0	none	0	Performance of ELF Serum Markers in Predicting Fibrosis Stage in Pediatric Non-Alcoholic Fatty Liver Disease	yes	does not apply	not given	NA
10	Gastroenterology	Juul T. Wijnen	Netherlands	0	Hans F.A. Vasen	Netherlands	0	2009	0	Dutch Cancer Society Grant	0	Chromosome 8q23.3 and 11q23.1 Variants Modify Colorectal Cancer Risk in Lynch Syndrome	yes	no	not given	NA
1	Gene and Development	olivier nolan-stevaux	USA	1	douglas hanahan	USA	1	2009	1	NIH, Carole and Bob Daly AACR-PANCAN Career Development Award for Pancreatic Cancer Research	0	GLI1 is regulated through Smoothened-independent mechanisms in neoplastic pancreatic ducts and mediates PDAC cell survival and transformation	yes	no	not given	not deposited
2	Gene and Development	patrik asp	USA	1	brian david dynlacht	USA	1	2009	1	NIH, AHA postdoctoral grant	0	E2f3b plays an essential role in myogenic differentiation through isoform-specific gene regulation	yes	no	given	not deposited
3	Gene and Development	changuang gong	USA	1	lynn E maquat	USA	1	2009	1	NIH	0	SMD and NMD are competitive pathways that contribute to myogenesis: effects on PAX3 and myogenin mRNAs	yes	no	not given	not deposited
4	Gene and Development	rohit prakash	USA	1	grzegorz ira	USA	1	2009	1	NIH, Wellcome Trust	0	Yeast Mph1 helicase dissociates Rad51-made D-loops: implications for crossover control in mitotic recombination	yes	no	not given	not deposited
5	Gene and Development	Sorina C. Popescu	USA	1	Savithramma P. Dinesh-Kumar	USA	1	2009	1	NSF grants	0	MAPK target networks in Arabidopsis thaliana revealed using functional protein microarrays	yes	no	given	not deposited
6	Gene and Development	mita chotalia	UK	0	gavin kelsey	UK	0	2009	0	Biotechnology and Biological Sciences Research Council of the United Kingdom and the European Union	0	Transcription is required for establishment of germline methylation marks at imprinted genes	yes	yes	given	deposited
7	Gene and Development	suzanne weber	Germany	0	Uta-Maria Bauer	Germany	0	2009	0	DFG (Deutsche Forschungsgemeinschaft), by funding from Land Hessen, and from BMBF (Bundesministerium für Bildung und Forschung) to U.M.B.	0	PRMT1-mediated arginine methylation of PIAS1 regulates STAT1 signaling	yes	no	not given	not deposited
8	Gene and Development	jessica D KESSLER	USA	1	Robert J. Wechsler-Reya	USA	1	2009	1	National Cancer Center (J.D.K.), NIDCR grant #DE016550 (F.W), the Whitehall Foundation (F.W), the McKnight Endowment Fund for Neuroscience (F.W), the Japanese Society for the Promotion of Science (H.H), the Children's Brain Tumor Foundation (R.W.R.), the McDonnell Foundation (R.W.R.), the Pediatric Brain Tumor Foundation of the US	0	N-myc alters the fate of preneoplastic cells in a mouse model of medulloblastoma	yes	no	not given	not deposited
9	Gene and Development	erin R P shull	USA	1	peter mckinnon	USA	1	2009	1	National Institutes of Health (NIH) (NS-37956 and CA-21765) and the CCSG (P30 CA21765), and the American Lebanese and Syrian Associated Charities	0	Differential DNA damage signaling accounts for distinct neural apoptotic responses in ATLD and NBS	yes	no	not given	not deposited
10	Gene and Development	Hsu-Kun Wang	USA	1	Louise T. Chow	USA	1	2009	1	This work was supported by USPHS grants	0	Robust production and passaging of infectious HPV in squamous epithelium of primary human keratinocytes	yes	no	not given	not deposited
1	Genome Research	Lili milani	Sweden	0	ann-christine syvanen	Sweden	0	2009	0	Swedish Cancer Foundation, Swedish Research Council for Science and Technology	0	allele specific gene expression patterns in primary leukemic cells reveal regulation og gene expression by CpG site methylation	yes	yes	given	not deposited
2	Genome Research	Craig winstanley	UK	0	robert E W hancock	Canada	0	2009	0	Wellcome Trust for the genome sequencing at the Sanger Institute	0	newly introduced genomic prophageislands are critical determinants of in vivo competitiveness in the liverpool epidemic strain of pseudomonas aeruginosa	yes	yes	not given	deposited
3	Genome Research	Robin C. Friedman	USA	1	David P. Bartel	USA	1	2009	1	NIH, Krell Institute/Department of Energy Computational Sciences Graduate Fellowship	0	Most mammalian mRNAs are conserved targets of microRNAs	yes	yes	given	not deposited
4	Genome Research	Lu-yong Wang	USA	1	Mark Gerstein	USA	1	2009	1	NIH	0	MSB: A mean-shift-based approach for the analysis of structural variation in the genome	yes	does not apply	not given	NA
5	Genome Research	Dominique J. Verlaan	Canada	0	Tomi Pastinen	Canada	0	2009	0	Genome Quebec and Genome Canada	0	Targeted screening of cis-regulatory variation in human haplotypes	yes	yes	given	not deposited
6	Genome Research	Sébastien Gallien	France	0	Sébastien Gallien	France	0	2009	0	INSERM, CNRS, and ULP, by “Protéomique et génie des protéines	0	Ortho-proteogenomics: Multiple proteomes investigation through orthology and a new MS-based protocol	yes	no	not given	not deposited
7	Genome Research	eivind valen	Denmark	0	Piero Carninci	Japan	0	2009	0	Novo Nordisk Foundation and National Project on Protein Structural and Functional Analysis from MEXT and the National Project on Genome Network Analysis and the RIKEN Genome Exploration Research Project from the Ministry of Education, Culture, Sports, Science and Technology of the Japanese Government	0	Genome-wide detection and analysis of hippocampus core promoters using DeepCAGE	yes	yes	given	deposited
8	Genome Research	Xiaowo Wang	China	0	Michael Q. Zhang2	USA	1	2009	1	NIH	0	High-resolution human core-promoter prediction with CoreBoost_HM	yes	yes	given	deposited
9	Genome Research	edward f attiyeh	USA	1	Genomic copy number determination in cancer cells from single nucleotide polymorphism microarrays based on quantitative genotyping corrected for aneuploidy	USA	1	2009	1	National Institutes of Health Grant K08CA123100 (E.F.A.), a Career Development Award from the American Society of Clinical Oncology (E.F.A.), R01-CA87847 (J.M.M.), U10-CA98543	0	Genomic copy number determination in cancer cells from single nucleotide polymorphism microarrays based on quantitative genotyping corrected for aneuploidy	yes	no	not given	not deposited
10	Genome Research	Gerhard Mittler	Denmark	0	Matthias Mann	Germany	0	2009	0	Danish National Research Foundation	0	A SILAC-based DNA protein interaction screen that identifies candidate binding proteins to functional DNA elements	yes	yes	given	deposited
1	Gut	D F Peng	USA	1	W L Rifai	USA	1	2009	1	National Cancer Institute	0	DNA hypermethylation regulates the expression of members of the Mu-class glutathione S-transferases and glutathione peroxidases in Barrett’s adenocarcinoma	no	no policy	not given	not deposited
2	Gut	M H Derakhshan	UK	0	K E L mcColl	UK	0	2009	0	North Glasgow Hospitals Endowment Fund	0	Oesophageal and gastric intestinal-type adenocarcinomas show the same male predominance due to a 17 year delayed development in females	no	no policy	not given	NA
3	Gut	M selgrad	USA	1	L Ricciardiello	USA	1	2009	1	the National Cancer Institute of the NIH (to CRB), and funds from the Baylor Research Institute; by grants from the Italian Ministry of University, Research, Science and Technology (COFIN Projects number 2002068514_002, 2003064378_003, 2004062155_003) and RFO funds from the University of Bologna to VS, RDeG, GB and RC. RDeG is a recipient of a grant from the “Fondazione Del Monte di Bologna e Rav…	0	JC virus infects the enteric glia of patients with chronic idiopathic intestinal pseudo-obstruction	no	no policy	not given	not deposited
4	Gut	E kokkotou	USA	1	E kokkotou	USA	1	2009	1	National Institutes of Health, IBD-0165 from the Broad Medical Research Program of The Broad Foundation (EK), P30-DK040561 from the Harvard Clinical Nutrition Research Center (EK) and by an American Gastroenterological Association Foundation (AGA Foundation) Bridging Grant	0	Melanin-concentrating hormone (MCH) modulates C difficile toxin A-mediated enteritis in mice	no	no policy	not given	not deposited
5	Gut	M C ARRIETA	Canada	0	J meddings	Canada	0	2009	0	Canadian Institute of Health Research.	0	Reducing small intestinal permeability attenuates colitis in the IL10 gene-deficient mouse	no	no policy	not given	NA
6	Gut	X Han	USA	1	X Han	USA	1	2009	1	Crohns and Colitis Foundation of America and NIH grant R01 DK058259	0	Regulation of intestinal barrier function by signal transducer and activator of transcription 5b	no	no policy	not given	deposited
7	Gut	H Takedatsu1	USA	1	S R Targan	USA	1	2009	0	the Feintech Chair in Inflammatory Bowel Disease (SRT) and the Cedars-Sinai Board of Governor’s Chair in Medical Genetics (JIR). Genotyping was supported in part by M01-RR00425 to the Cedars-Sinai GCRC genotyping core (KDT	0	Linkage of Crohn’s disease-related serological phenotypes: NFKB1 haplotypes are associated with anti-CBir1 and ASCA, and show reduced NF-κB activation	no	no policy	not given	not deposited
8	Gut	o k bonderup	Denmark	0	o k bonderup	Denmark	0	2009	0	AstraZeneca.	1	Long-term budesonide treatment of collagenous colitis: a randomised, double-blind, placebo-controlled trial	no	no policy	not given	NA
9	Gut	j pohl	Germany	0	j pohl	Germany	0	2009	0	Fujinon, Saitama, Japan	1	Computed virtual chromoendoscopy versus standard colonoscopy with targeted indigocarmine chromoscopy: a randomised multicentre trial	no	no policy	not given	NA
10	Gut	B Carvalho1	Netherlands	0	g a mwijer	Netherlands	0	2009	0	Dutch Cancer Society	0	Multiple putative oncogenes at the chromosome 20q amplicon contribute to colorectal adenoma to carcinoma progression	no	no policy	not given	deposited
1	Hepatology	JOO CHUN YOUN	USA	1	barbara rehermann	USA	1	2009	1	National Institute of Diabetes and Digestive and Kidney Diseases National Institutes of Health intramural research program Deutsche Forschungsgemeinschaft (DFG), Bonn, Germany;	0	Natural killer cell function is intact after direct exposure to infectious hepatitis C virions	yes	no	not given	not deposited
2	Hepatology	Montserrat Laguno	Spain	0	Montserrat Laguno	Spain	0	2009	0	Spanish Ministry of Health; Grant Number: FIS 2007 Institut d' Investigacions Biomèdiques August Pi i Sunyer (IDIBAPS) Red Temática de Investigación en SIDA (Red de grupos del FIS) Spanish Ministry of Health; Grant Number: FIS 2007 Institut d' Investigacions Biomèdiques August Pi i Sunyer (IDIBAPS) Red Temática de Investigación en SIDA (Red de grupos del FIS)	0	Randomized trial comparing pegylated interferon -2b versus pegylated interferon -2a, both plus ribavirin, to treat chronic hepatitis C in human immunodeficiency virus patients	yes	no	not given	NA
3	Hepatology	harel dahari	USA	1	Alan S. Perelson	USA	1	2009	1	U.S. Department of Energy; Grant Number: DE-AC52-06NA25396 National Institutes of Health (NIH); Grant Number: RR06555 NIH National Center for Research Resources (NCRR); Grant Number: P20-RR18754 University of Illinois Gastrointestinal and Liver Disease (UIC GILD) Association	0	Modeling complex decay profiles of hepatitis B virus during antiviral therapy	yes	does not apply	not given	NA
4	Hepatology	Benedikte Serruys	Belgium	0	Geert Leroux-Roels	Belgium	0	2009	0	Institute for the Promotion of Innovation through Science and Technology in Flanders (IWT-Vlaanderen	0	Llama-derived single-domain intrabodies inhibit secretion of hepatitis B virions in mice	yes	no	not given	NA
5	Hepatology	coralie pallier	France	0	Jean-Michel Pawlotsky	France	0	2009	0	VIRGIL European Network of Excellence on Antiviral Drug Resistance Priority 1 Life Sciences, Genomics, and Biotechnology for Health program in the 6th Framework Programme of the European Union; Grant Number: LSHM-CT-2004-503359 Gilead Sciences	0	Complex dynamics of hepatitis B virus resistance to adefovir	yes	yes	not given	NA
6	Hepatology	Hong Tang	China	0	Mujun Zhao	China	0	2009	0	National High Technology Research and Development of China	0	Hepatitis B virus X protein sensitizes cells to starvation-induced autophagy via up-regulation of beclin 1 expression	yes	no	not given	not deposited
7	Hepatology	Nancy Leung	China	0	Nancy Leung	China	0	2009	0	Bristol-Myers Squibb, Gilead, and Novartis	1	Early hepatitis B virus DNA reduction in hepatitis B e antigen-positive patients with chronic hepatitis B: A randomized international study of entecavir versus adefovir	yes	does not apply	not given	NA
8	Hepatology	Stephen A. Harrison	USA	1	Stephen A. Harrison	USA	1	2009	0	none	0	Orlistat for overweight subjects with nonalcoholic steatohepatitis: A randomized, prospective trial	yes	does not apply	not given	NA
9	Hepatology	Rajat Singh	USA	1	Mark J. Czaja	USA	1	2009	1	NIH and american liver foundation	0	Differential effects of JNK1 and JNK2 inhibition on murine steatohepatitis and insulin resistance	yes	no	not given	not deposited
10	Hepatology	Sylvie Naveau	France	0	Thierry Poynard	France	0	2009	0	none	0	Diagnostic and prognostic values of noninvasive biomarkers of fibrosis in patients with alcoholic liver disease	yes	does not apply	not given	NA
1	Immunity	Gang Dong	USA	1	Karin M. Reinisch, Peter Cresswell	USA	1	2009	1	NIH	0	Insights into MHC Class I Peptide Loading from the Structure of the Tapasin-ERp57 Thiol Oxidoreductase Heterodimer	yes	yes	not given	deposited
2	Immunity	Claire Conche	France	0	Clotilde Randriamampita	France	0	2009	0	Centre National de la Recherche Scientifique, INSERM, and Ligue Nationale Contre le Cancer	0	T Cell Adhesion Primes Antigen Receptor-Induced Calcium Responses through a Transient Rise in Adenosine 3′,5′-Cyclic Monophosphate	yes	no	not given	NA
3	Immunity	Pavel Tolar	USA	1	Susan K. Pierce	USA	1	2009	1	NIH, National Institute of Allergy and Infectious Diseases	0	The Constant Region of the Membrane Immunoglobulin Mediates B Cell-Receptor Clustering and Signaling in Response to Membrane Antigens	yes	no	not given	not deposited
4	Immunity	Thomas Kaufmann	Austrailia	0	Andreas Strasser	Austrailia	0	2009	1	NHMRC (Canberra), the NCI, Leukemia and Lymphoma Society of America	0	Fatal Hepatitis Mediated by Tumor Necrosis Factor TNFα Requires Caspase-8 and Involves the BH3-Only Proteins Bid and Bim	yes	yes	not given	NA
5	Immunity	Thorsten B. Feyerabend	Germany	0	Hans-Reimer Rodewald	Germany	0	2009	0	Deutsche Forschungsgemeinschaft	0	Deletion of Notch1 Converts Pro-T Cells to Dendritic Cells and Promotes Thymic B Cells by Cell-Extrinsic and Cell-Intrinsic Mechanisms	yes	no	not given	not deposited
6	Immunity	li fan lu	USA	1	Alexander Y. Rudensky	USA	1	2009	1	National Institutes of Health (to A.Y.R. and K.R.), from the European Union through MUGEN (to K.R.), and from the Ministry of Education, Culture, Sports, Science, and Technology of Japan,	0	Foxp3-Dependent MicroRNA155 Confers Competitive Fitness to Regulatory T Cells by Targeting SOCS1 Protein	yes	no	not given	not deposited
7	Immunity	yun kiung lee	USA	1	Casey T. Weaver	USA	1	2009	1	NIH (C.T.W.) and Daichi-Sankyo Co. Ltd. (C.T.W.).	0	Late Developmental Plasticity in the T Helper 17 Lineage Late Developmental Plasticity in the T Helper 17 Lineage	yes	yes	not given	deposited
8	Immunity	Harumichi Ishigame	Japan	0	Yoichiro Iwakura	Japan	0	2009	0	Core Research for Evolutional Science and Technology of the Japan Science and Technology Corporation (Y.I.); the Promotion of Basic Research Activities for Innovative Biosciences (Y.I.); Grants-in-Aid from the Ministry of Education, Culture, Sports, Science and Technology of Japan; the Ministry of Health, Labour and Welfare of Japan; the Japan Chemical Industry Association (the Long-Range Researc…	0	Differential Roles of Interleukin-17A and -17F in Host Defense against Mucoepithelial Bacterial Infection and Allergic Responses	yes	no	not given	not deposited
9	Immunity	melissa dullaers	USA	1	SangKon Oh	USA	1	2009	0	BHCS Foundation	0	A T Cell-Dependent Mechanism for the Induction of Human Mucosal Homing Immunoglobulin A-Secreting Plasmablasts	yes	no	not given	not deposited
10	Immunity	Panayiotis Victoratos	Greece	0	George Kollias1	Greece	0	2009	0	europeon comission funding to greekkingdom	0	Induction of Autoantibody-Mediated Spontaneous Arthritis Critically Depends on Follicular Dendritic Cells	yes	yes	not given	NA
1	JAMA	Scott M. Lippman,	USA	1	Scott M. Lippman,	USA	1	2009	1	Public Health Service Cooperative Agreement grant CA37429 awarded by the National Cancer Institute, National Institutes of Health, Department of Health and Human Services, and in part by the National Center for Complementary and Alternative Medicine (National Institutes of Health). Study agents and packaging were provided by Perrigo Company (Allegan, Michigan), Sabinsa Corporation (Piscataway, Ne…	0	Effect of Selenium and Vitamin E on Risk of Prostate Cancer and Other Cancers	yes	does not apply	not given	NA
2	JAMA	J. Michael Gaziano	USA	1	J. Michael Gaziano	USA	1	2009	1	grants from the National Institutes of Health (Bethesda, Maryland) and an investigator-initiated grant from BASF Corporation (Florham Park, New Jersey). Study agents and packaging were provided by BASF Corporation, Wyeth Pharmaceuticals (Madison, New Jersey), and DSM Nutritional Products Inc (formerly Roche Vitamins) (Parsippany, New Jersey).	0	Vitamins E and C in the Prevention of Prostate and Total Cancer in Men: The Physicians' Health Study II Randomized Controlled Trial	yes	does not apply	not given	NA
3	JAMA	Frances M. Weaver	USA	1	Frances M. Weaver	USA	1	2009	1	The Cooperative Studies Program of the Department of Veterans Affairs Office of Research and Development, the National Institute of Neurological Disorders and Stroke, and Medtronic Neuromodulation provided financial support Tfor this study.	0	Bilateral Deep Brain Stimulation vs Best Medical Therapy for Patients With Advanced Parkinson Disease: A Randomized Controlled Trial	yes	does not apply	not given	NA
4	JAMA	Mary M. McDermott	USA	1	Mary M. McDermott	USA	1	2009	1	grants R01-HL073551 from the National Heart, Lung, and Blood Institute and by RR-00048 from the National Center for Research Resources, National Institutes of Health. This was also supported in part by the Intramural Research Program, National Institutes on Aging.	0	Treadmill Exercise and Resistance Training in Patients With Peripheral Arterial Disease With and Without Intermittent Claudication: A Randomized Controlled Trial	yes	does not apply	not given	NA
5	JAMA	Maria Makrides	Austrailia	0	Maria Makrides	Austrailia	0	2009	0	grant from the Australian National Health and Medical Research Council (grant 250322) and by the Channel 7 Children's Research Foundation of South Australia Inc. Treatment and placebo capsules were donated by Clover Corp and infant formula was donated by Mead Johnson Nutritionals and Nutricia Australasia	0	Neurodevelopmental Outcomes of Preterm Infants Fed High-Dose Docosahexaenoic Acid: A Randomized Controlled Trial	yes	does not apply	not given	NA
6	JAMA	sheila isanaka	USA	1	sheila isanaka	USA	1	2009	1	Médecins Sans Frontières (MSF), national cancer institute	0	Effect of Preventive Supplementation With Ready-to-Use Therapeutic Food on the Nutritional Status, Mortality, and Morbidity of Children Aged 6 to 60 Months in Niger	yes	does not apply	not given	NA
7	JAMA	jasmine grewal	USA	1	patricia a pellikka	USA	1	2009	1	National Center for Research Resources, a component of the National Institutes of Health and mayo foundation	0	Left Ventricular Function and Exercise Capacity	yes	does not apply	not given	NA
8	JAMA	mathias pfisterer	Switzerland	0	mathias pfisterer	Switzerland	0	2009	0	Horten Research Foundation (Lugano, Switzerland) and AstraZeneca Pharma, Novartis Pharma, Menarini Pharma, Pfizer Pharma, Servier, Roche Diagnostics, Roche Pharma, and Merck Pharma. AstraZeneca Pharma, Novartis Pharma, Menarini Pharma, Pfizer Pharma, Servier, Roche Diagnostics, Roche Pharma, and Merck Pharma.	0	BNP-Guided vs Symptom-Guided Heart Failure Therapy The Trial of Intensified vs Standard Medical Therapy in Elderly Patients With Congestive Heart Failure (TIME-CHF) Randomized Trial	yes	does not apply	not given	NA
9	JAMA	jun j yang	USA	1	Mary V. Relling	USA	1	2009	1	National Institutes of Health (NIH)/National Institute of General Medical Sciences (NIGMS) Pharmacogenetics Research Network and Database grants U01 GM61393 and U01 GM61374 (http://www.pharmgkb.org) from the National Cancer Institute and NIGMS; by the American Lebanese Syrian Associated Charities; and by CureSearch. National Institutes of Health (NIH)/National Institute of General Medical Science…	0	Genome-wide Interrogation of Germline Genetic Variation Associated With Treatment Response in Childhood Acute Lymphoblastic Leukemia	yes	yes	given in appendix	not deposited
10	JAMA	kevin c oeffinger	USA	1	kevin c oeffinger	USA	1	2009	1	National Cancer Institute, Department of Health and Human Services and the Centers for Disease Control and Prevention; U24-CA-55727 (Dr Robison, principal investigator) from the Department of Health and Human Services; funding to the University of Minnesota from the Children's Cancer Research Fund; and funding to St Jude Children's Research Hospital from the American Lebanese Syrian Associated Ch…	0	Breast Cancer Surveillance Practices Among Women Previously Treated With Chest Radiation for a Childhood Cancer	yes	yes	not given	NA
1	Journal of Cell Biology	alexandre Mejat	USA	1	tom misteli	France	0	2009	1	Intramural Research Program of the National Institutes of Health (NIH), NCI, and Center for Cancer Research; the Institut National de la Santé et de la Recherche Médicale (INSERM), Assistance Publique-Hôpitaux de Paris, Association Française contre les Myopathies (AFM), the European Union Fifth Framework	0	Lamin A/C–mediated neuromuscular junction defects in Emery-Dreifuss muscular dystrophy	yes	no	not given	not deposited
2	Journal of Cell Biology	ashraf N melhas	UK	0	david J vaux	UK	0	2009	0	Edward Penley Abraham Trust and by Tim and Kit Kemp. A.N. Malhas is a Kemp Postdoctoral Fellow of Lincoln College at the University of Oxford	0	Lamin B1 controls oxidative stress responses via Oct-1	yes	yes	not given	deposited
3	Journal of Cell Biology	ren xu	USA	1	ren xu	USA	1	2009	1	NIH, Office of Biological and Environmental Research (OBER) of the Department of Energy	0	sustained activation of STAT5 is essential for chromatin remodeling and mantainance of mammary specific function	yes	no	not given	not deposited
4	Journal of Cell Biology	xin zhang	UK	0	majlinda laku	UK	0	2009	0	Medical Research Council , Biotechnology and Biological Sciences Research Co	0	A role for nano-G in G1 to S transition in humna embryonic stem cells through direct binding of CDK6 and CDC25A	yes	no	not given	not deposited
5	Journal of Cell Biology	vincio A dE JESUS PAREZ	USA	1	MARLENE RABINOVITCH	USA	1	2009	1	NIH, Wall Center for Pulmonary Vascular Diseases at Stanford University	0	bone morphogenetic protein 2 induces pulmonary angiogenesis via Wnt-BETA-catenin and wnt-rhoA-Rac1 pathways	yes	yes	not given	deposited
6	Journal of Cell Biology	Dana S. Wall	Canada	0	Valerie A. Wallace	Canada	0	2009	0	Canadian Cancer Society	0	Progenitor cell proliferation in the retina is dependent on Notch-independent Sonic hedgehog/Hes1 activity	yes	no	not given	not deposited
7	Journal of Cell Biology	Rachel H. Roberts-Galbraith1	USA	1	Kathleen L. Gould	USA	1	2009	1	National Science Foundation	0	The SH3 domains of two PCH family members cooperate in assembly of the Schizosaccharomyces pombe contractile ring	yes	yes	not given	deposited
8	Journal of Cell Biology	Yasushi Tamura	Japan	0	toshiya endo	USA	1	2009	0	Grants-in Aid for Scientific Research of the Ministry of Education, Culture, Sports, Science and Technology and a grant from the Japan Science and Technology Agency	0	Tim23–Tim50 pair coordinates functions of translocators and motor proteins in mitochondrial protein import	yes	yes	not given	NA
9	Journal of Cell Biology	Xin Wang	USA	1	Jairaj K. Acharya	USA	1	2009	1	Intramural Research Program of the National Cancer Institute, National Institutes of Health, and Department of Health and Human Services. U. Acharya is supported by a grant from the National Institutes of Health	0	Mitochondrial degeneration and not apoptosis is the primary cause of embryonic lethality in ceramide transfer protein mutant mice	yes	no	not given	not deposited
10	Journal of Cell Biology	Simone Clerc	Switzerland	0	Markus Aebi	Switzerland	0	2009	0	Swiss National Science Foundation (grants to C. Jakob and M. Aebi) and the Eidgenössische Technische Hochschule Zurich	0	Htm1 protein generates the N-glycan signal for glycoprotein degradation in the endoplasmic reticulum	yes	no	not given	not deposited
1	Journal of Clinical Investigation	Irini Bournazou	UK	0	Christopher D. Gregory	UK	0	2009	0	MRC, Leukemia research	0	Apoptotic human cells inhibit migration of granulocytes via release of lactoferrin	yes	no	not given	not deposited
2	Journal of Clinical Investigation	Toshihiro Ito	USA	1	Steven L. Kunkel	USA	1	2009	1	NIH	0	TLR9 regulates the mycobacteria-elicited pulmonary granulomatous immune response in mice through DC-derived Notch ligand delta-like 4	yes	no	not given	NA
3	Journal of Clinical Investigation	Haoli Jin	USA	1	Raif S. Geha	USA	1	2009	1	American Heart Association, Deutsche Forschungsgemeinschaft, G. Harold and Leila Y. Mathers Charitable Foundation, Atopic Dermatitis Vaccinia Network NIH/NIAID	0	IL-21R is essential for epicutaneous sensitization and allergic skin inflammation in humans and mice	yes	no	not given	not deposited
4	Journal of Clinical Investigation	Stefan Haak	Switzerland	0	Burkhard Becher, Ari Waisman	Switzerland	0	2009	0	Swiss national science foundation, US national MS society, Swiss MS Society, National center of competence in research, Merck Serono International, FP6 Marie Curie Research training network, Deutsche Forschungsgemeinschaft, Boehringer Ingelheim Stifrung, US NIH	0	IL-17A and IL-17F do not contribute vitally to autoimmune neuro-inflammation in mice	yes	no	not given	not deposited
5	Journal of Clinical Investigation	Stefano Romeo	USA	1	Jonathan C. Cohen, Helen H. Hobbs	USA	1	2009	1	Donald W. Reynolds Foundation, NIH, AHA Texas affiliate fellowship	0	Rare loss-of-function mutations in ANGPTL family members contribute to plasma triglyceride levels in humans	yes	no	not given	not deposited
6	Journal of Clinical Investigation	cristoph a gerard	UK	0	Frances M. Ashcroft1	UK	0	2009	0	Wellcome Trust, the Medical Research council, the European Union	0	Expression of an activating mutation in the gene encoding the KATP channel subunit Kir6.2 in mouse pancreatic β cells recapitulates neonatal diabetes	yes	no	not given	not deposited
7	Journal of Clinical Investigation	Mirjam van der Burg1	Netherlands	0	Dik C. van Gent2	Netherlands	0	2009	1	Dutch Organization for Scientific Research, the Dutch Cancer Society (KWF; grant EMCR 2002-2734 to D.C. van Gent, M.Z. Zdzienicka, and J.J.M. van Dongen), the European Community (RISC-RAD: grant FI6R-CT-2003-508842; and DNA repair: grant LSHG-CT-2005-512113; to P.O. Mari and D.C. van Gent), and the NIH	0	A DNA-PKcs mutation in a radiosensitive T–B– SCID patient inhibits Artemis activation and nonhomologous end-joining	yes	no	not given	not deposited
8	Journal of Clinical Investigation	Katharina Eikermann-Haerter1	USA	1	Cenk Ayata1	USA	1	2009	1	Deutsche Forschungsgemeinschaft (Ha5085/1-1 to K. Eikermann-Haerter), National Institute of Neurological Disorders and Stroke (1R01NS061505 to C. Ayata; 2P01NS35611 to M.A. Moskowitz), Netherlands Organization for Scientific Research (903-52-291 and Vici 918.56.602 to M.D. Ferrari), EU “EUROHEAD” grant (LSHM-CT-2004-504837 to M.D. Ferrari, A.M.J.M. van den Maagdenberg), and the Centre for Medical…	0	Genetic and hormonal factors modulate spreading depression and transient hemiparesis in mouse models of familial hemiplegic migraine type	yes	no	not given	not deposited
9	Journal of Clinical Investigation	takeshi kanda	USA	1	Jorge Plutzky	USA	1	2009	1	Sankyo Foundation of Life Science, the Mochida Memorial Foundation for Medical and Pharmaceutical Research, and the Uehara Memorial Foundation (to T. Kanda) and by the NIH National Heart Lung and Blood Institute grants	0	PPARγ in the endothelium regulates metabolic responses to high-fat diet in mice	yes	no	not given	not deposited
10	Journal of Clinical Investigation	james cantley	USA	1	Dominic J. Withers1	UK	0	2009	1	National Heart, Lung, and Blood Institute	0	Deletion of the von Hippel–Lindau gene in pancreatic β cells impairs glucose homeostasis in mice	yes	no	not given	not deposited
1	Journal of Clinical Oncology	Alvaro Moreno-Aspitia	USA	1	Alvaro Moreno-Aspitia	USA	1	2009	1	NCI, Public health services grant	0	Phase II Trial of Sorafenib in Patients With Metastatic Breast Cancer Previously Exposed to Anthracyclines or Taxanes: North Central Cancer Treatment Group and Mayo Clinic Trial N0336	no	no policy	not given	NA
2	Journal of Clinical Oncology	Ivo A. Olivotto	Canada	0	Ivo A. Olivotto	Canada	0	2009	0	none	0	Intervals Longer Than 20 Weeks From Breast-Conserving Surgery to Radiation Therapy Are Associated With Inferior Outcome for Women With Early-Stage Breast Cancer Who Are Not Receiving Chemotherapy	no	no policy	not given	NA
3	Journal of Clinical Oncology	Alessandro Gronchi	Italy	0	Alessandro Gronchi	Italy	0	2009	0	none	0	Aggressive Surgical Policies in a Retrospectively Reviewed Single-Institution Case Series of Retroperitoneal Soft Tissue Sarcoma Patients	no	no policy	not given	NA
4	Journal of Clinical Oncology	Sylvie Bonvalot	France	0	Sylvie Bonvalot	France	0	2009	0	none	0	Primary Retroperitoneal Sarcomas: A Multivariate Analysis of Surgical Factors Associated With Local Control	no	no policy	not given	NA
5	Journal of Clinical Oncology	Ahmad A. Tarhini	USA	1	John M. Kirkwood	USA	1	2009	0	DiaSorin	1	Prognostic Significance of Serum S100B Protein in High-Risk Surgically Resected Melanoma Patients Participating in Intergroup Trial ECOG 1694	no	no policy	not given	NA
6	Journal of Clinical Oncology	Hanne Stensheim	Norway	0	Hanne Stensheim	Norway	0	2009	0	EXTRA funds from the Norwegian Foundation for Health and Rehabilitation	0	Cause-Specific Survival for Women Diagnosed With Cancer During Pregnancy or Lactation: A Registry-Based Cohort Study	no	no policy	not given	NA
7	Journal of Clinical Oncology	karen m emmons	USA	1	karen m emmons	USA	1	2009	1	National Institutes of Health; support provided to the University of Minnesota by the Children's Cancer Research Fund; and support provided to the Dana-Farber Cancer Institute by Liberty Mutual, the Patterson Fellowship Fund, and the Harry and Elsa Jiler American Cancer Society Research Professorship	0	Long-Term Smoking Cessation Outcomes Among Childhood Cancer Survivors in the Partnership for Health Study	no	no policy	not given	NA
8	Journal of Clinical Oncology	Thomas Büchner	Germany	0	Thomas Büchner	Germany	0	2009	0	Deutsche Krebshilfe, Grant No. 01 GI 9976 from Bundesministerium Bildung und Forschung Competence Network Acute and Chronic Leukemias	0	Age-Related Risk Profile and Chemotherapy Dose Response in Acute Myeloid Leukemia: A Study by the German Acute Myeloid Leukemia Cooperative Group	no	no policy	not given	NA
9	Journal of Clinical Oncology	moyra e mills	UK	0	moyra e mills	UK	0	2009	0	Northern Ireland Research and Development Office	0	Does a Patient-Held Quality-of-Life Diary Benefit Patients With Inoperable Lung Cancer?	no	no policy	not given	NA
10	Journal of Clinical Oncology	Berend J. Slotman	UK	0	Berend J. Slotman	UK	0	2009	1	National Cancer Institute (Bethesda, MD), as well as by the EORTC Charitable Trust.	0	Prophylactic Cranial Irradiation in Extensive Disease Small-Cell Lung Cancer: Short-Term Health-Related Quality of Life and Patient Reported Symptoms—Results of an International Phase III Randomized Controlled Trial by the EORTC Radiation Oncology and Lung Cancer Groups	no	no policy	not given	NA
1	Journal of Experimental Medicine	Siim Pauklin	UK	0	Svend K. Petersen-Mahrt	UK	0	2009	0	Cancer Research UK	0	Estrogen directly activates AID transcription and function	yes	no	not given	not deposited
2	Journal of Experimental Medicine	Mark W.M. Schellings	Netherlands	0	Stephane Heymans	Netherlands	0	2009	0	Netherlands Heart Foundation, NIH, Ingenious Hypercare NoE EU , Research fund K.U. Leuven	0	Absence of SPARC results in increased cardiac rupture and dysfunction after acute myocardial infarction	yes	no	not given	not deposited
3	Journal of Experimental Medicine	Annaiah Cariappa	USA	1	Shiv Pillai	USA	1	2009	1	NIH	0	B cell antigen receptor signal strength and peripheral B cell development are regulated by a 9-O-acetyl sialic acid esterase	yes	no	not given	not deposited
4	Journal of Experimental Medicine	J. Andrew Duty	USA	1	Patrick C. Wilson	USA	1	2009	1	NIH	0	Functional anergy in a subpopulation of naive B cells from healthy humans that express autoreactive immunoglobulin receptors	yes	no	not given	not deposited
5	Journal of Experimental Medicine	Fubin Li	USA	1	Laurel A. Eckhardt	USA	1	2009	1	NIH	0	A role for the IgH intronic enhancer Eµ in enforcing allelic exclusion	yes	yes	not given	deposited
6	Journal of Experimental Medicine	cristopher schuster	Austria	0	Adelheid Elbe-Bürger1	Austria	0	2009	0	Austrian Science Fund	0	HLA-DR+ leukocytes acquire CD1 antigens in embryonic and fetal human skin and contain functional antigen-presenting cells	yes	no	not given	not deposited
7	Journal of Experimental Medicine	yasuo mori	Japan	0	Koichi Akashi1	Japan	0	2009	0	Japanese Ministry of Education, Culture, Sports, Science and Technology (grant 18604006 to H. Iwasaki, and grants 17109010 and 17047029 to K. Akashi), the Takeda Science Foundation, and the Mochida Memorial Foundation for Medical and Pharmaceutical Research	0	Identification of the human eosinophil lineage-committed progenitor: revision of phenotypic definition of the human common myeloid progenitor	yes	no	not given	not deposited
8	Journal of Experimental Medicine	yong jun yang	Canada	0	Tong-Jun Lin1	Canada	0	2009	0	Canadian Institutes of Health Research And canadian cystic fibrosis foundation	0	Rcan1 negatively regulates FcRI-mediated signaling and mast cell function	yes	no	not given	not deposited
9	Journal of Experimental Medicine	julia k archbold	Austrailia	0	Jamie Rossjohn1	Austrailia	0	2009	0	National Health and Medical Research Council (NHMRC) of Australia and the Australian Research Council (ARC).	0	Natural micropolymorphism in human leukocyte antigens provides a basis for genetic control of antigen recognition	yes	yes	not given	deposited
10	Journal of Experimental Medicine	ramin massoumi	Germany	0	Anja K. Bosserhoff	Germany	0	2009	0	German Research Association (to A.K. Bosserhoff, A. Pfeifer, and R. Fassler), the Dr. Mildred Scheel Foundation for Cancer Research, Melanoma Network (to A.K. Bosserhoff), the Swedish Society for Medical Research, Swedish Cancer Foundation, Swedish Medical Research Council, Royal Physiographic Society in Lund, U-MAS Research Foundations (to R. Massoumi), and the Max Planck Society	0	Down-regulation of CYLD expression by Snail promotes tumor progression in malignant melanoma	yes	no	not given	not deposited
1	Journal of National Cancer Institute	Jennifer Lin	USA	1	Jennifer Lin	USA	1	2009	1	National Heart, Lung, and Blood Institute, national cancer institute	0	Vitamins C and E and Beta Carotene Supplementation and Cancer Risk: A Randomized Controlled Trial	yes	yes	not given	NA
2	Journal of National Cancer Institute	Paolo Vineis	UK	0	John P. A. Ioannidis	Greece	0	2009	0	ECNIS (Environmental Cancer Risk, Nutrition and Individual Susceptibility). compagnia di San Paolo, of the Italian Association for Cancer Research, Italy, and of the Piedmont Region Progetti di Ricerca Sanitaria Finalizzata	0	A Field Synopsis on Low-Penetrance Variants in DNA Repair Genes and Cancer Susceptibility	yes	yes	not given	deposited
3	Journal of National Cancer Institute	Victoria Hellberg	Sweden	0	Victoria Hellberg	Sweden	0	2009	0	AFA Insurance, Alice and Knut Wallenberg Foundation, foundations Tysta Skolan, Petrus and Augusta Hedlund Foundation ,Cancerforeningen Stockholm , Swedish Cancer Society , Karolinska Institutet Cancer Network (KICancer) Strategic Funds	0	Cisplatin and Oxaliplatin Toxicity: Importance of Cochlear Kinetics as a Determinant for Ototoxicity	yes	yes	not given	NA
4	Journal of National Cancer Institute	Marc J. Gunter	USA	1	Marc J. Gunter	USA	1	2009	1	National Cancer Institute ,	0	Insulin, Insulin-Like Growth Factor-I, and Risk of Breast Cancer in Postmenopausal Women	yes	yes	not given	NA
5	Journal of National Cancer Institute	Timothy R. Rebbeck	USA	1	Timothy R. Rebbeck	USA	1	2009	0	none	0	Meta-analysis of Risk Reduction Estimates Associated With Risk-Reducing Salpingo-oophorectomy in BRCA1 or BRCA2 Mutation Carriers	yes	does not apply	not given	NA
6	Journal of National Cancer Institute	pontus naucler	Sweden	0	Joakim Dillner	Sweden	0	2009	0	Swedish Cancer Society (nrs 3824 and 2098) and Europe against Cancer (nrSPC2002475). Swedish Cancer Society (nrs 3824 and 2098) and Europe against Cancer (nrSPC2002475).	0	Efficacy of HPV DNA Testing With Cytology Triage and/or Repeat HPV DNA Testing in Primary Cervical Cancer Screening	yes	yes	not given	NA
7	Journal of National Cancer Institute	ambuj kumar	USA	1	ambuj kumat	USA	1	2009	0	no funding	0	Tandem Versus Single Autologous Hematopoietic Cell Transplantation for the Treatment of Multiple Myeloma: A Systematic Review and Meta-analysis	yes	does not apply	not given	NA
8	Journal of National Cancer Institute	J. L. Lefebvre	France	0	J. L. Lefebvre	France	0	2009	1	National Cancer Institute (Bethesda, MD). This research project was supported by Fonds Cancer/FOCA (Belgium).	0	Phase 3 Randomized Trial on Larynx Preservation Comparing Sequential vs Alternating Chemotherapy and Radiotherapy	yes	yes	not given	NA
9	Journal of National Cancer Institute	long fu xi	USA	1	long fu xi	USA	1	2009	1	Public Health Service grant (CA 84396 to LFX). ALTS was supported by the National Cancer Institute, National Institutes of Health Department of Health and Human Services contracts and national cancer institute	0	Human Papillomavirus Type 18 DNA Load and 2-Year Cumulative Diagnoses of Cervical Intraepithelial Neoplasia Grades 2–3	yes	yes	not given	NA
10	Journal of National Cancer Institute	elly S W Ngan	Hong Kong	0	elly S W Ngan	Hong Kong	0	2009	0	University of Hong Kong to E.S.W.N., and by research grants HKU 772808M and HKU 767307M from the Hong Kong Research Grants Council to E.S.W.N. and U.-S.K., respectively.	0	A Germline Mutation (A339V) in Thyroid Transcription Factor-1 (TITF-1/NKX2.1) in Patients With Multinodular Goiter and Papillary Thyroid Carcinoma	yes	no	not given	not deposited
1	Journal of the American College of Cardiology	Wojciech Wojakowski	Poland	0	Mariusz Z. Ratajczak	USA	1	2009	1	National Institutes of Health grant R01 CA106281-01; Polish Ministry of Science and Higher Education grants PBZ-KBN-099/P05/2003, 0651/P01/2007/32, 2422/P01/2007/32; and the European Vascular Genomics Network	0	Mobilization of Bone Marrow-Derived Oct-4+ SSEA-4+ Very Small Embryonic-Like Stem Cells in Patients With Acute Myocardial Infarction	no	no policy	not given	NA
2	Journal of the American College of Cardiology	Douglas W. Losordo	USA	1	Douglas W. Losordo	USA	1	2009	0	none	0	Prevention of Recurrent Lone Atrial Fibrillation by the Angiotensin-II Converting Enzyme Inhibitor Ramipril in Normotensive Patients	no	no policy	not given	NA
3	Journal of the American College of Cardiology	Justin A. Ezekowitz	Canada	0	Justin A. Ezekowitz	Canada	0	2009	0	Operating Grant from the CIHR	0	Declining In-Hospital Mortality and Increasing Heart Failure Incidence in Elderly Patients With First Myocardial Infarction	no	no policy	not given	NA
4	Journal of the American College of Cardiology	Melda S. Dolan	USA	1	Melda S. Dolan	USA	1	2009	0	none	0	Safety and Efficacy of Commercially Available Ultrasound Contrast Agents for Rest and Stress Echocardiography: A Multicenter Experience	no	no policy	not given	NA
5	Journal of the American College of Cardiology	dania mohty	Canada	0	Philippe Pibarot	Canada	0	2009	0	Canadian Institutes of Health Research (MOP 57745), Ottawa, Ontario, Canada.	0	Impact of Prosthesis-Patient Mismatch on Long-Term Survival After Aortic Valve Replacement: Influence of Age, Obesity, and Left Ventricular Dysfunction	no	no policy	not given	NA
6	Journal of the American College of Cardiology	Yoshimitsu Soga	Japan	0	Hiroyoshi Yokoi	Japan	0	2009	0	no mention	0	Efficacy of Cilostazol After Endovascular Therapy for Femoropopliteal Artery Disease in Patients With Intermittent Claudication	no	no policy	not given	NA
7	Journal of the American College of Cardiology	Deborah B. Diercks	USA	1	Deborah B. Diercks	USA	1	2009	0	no mention	0	Utilization and Impact of Pre-Hospital Electrocardiograms for Patients With Acute ST-Segment Elevation Myocardial Infarction	no	no policy	not given	NA
8	Journal of the American College of Cardiology	Naveed Sattar	UK	0	Naveed Sattar	UK	0	2009	0	British Heart Foundation project and program grants	0	Leptin and Coronary Heart Disease	no	no policy	not given	NA
9	Journal of the American College of Cardiology	Thomas Rutledge	USA	1	Thomas Rutledge	USA	1	2009	1	Supported by contracts from the National Heart, Lung, and Blood Institute (N01-HV-68161, N01-HV-68162, N01-HV-68163, N01-HV-68164, grants U0164829, U01 HL649141, U01 HL649241); a General Clinical Research Center grant (MO1-RR00425) from the National Center for Research Resources; and grants from the Gustavus and Louis Pfeiffer Research Foundation, Denville, New Jersey; The Women's Guild of Cedars…	0	Depression and Cardiovascular Health Care Costs Among Women With Suspected Myocardial Ischemia	no	no policy	not given	NA
10	Journal of the American College of Cardiology	Adrian F. Hernandez	USA	1	Adrian F. Hernandez	USA	1	2009	0	GlaxoSmithKline	1	Clinical Effectiveness of Beta-Blockers in Heart Failure	no	no policy	not given	NA
1	Lancet	A J Stanley	UK	0	A J Stanley	UK	0	2009	0	None	0	Outpatient management of patients with low-risk upper-gastrointestinal haemorrhage: multicentre validation and prospective evaluation	yes	does not apply	not given
2	Lancet	Reuben Granich	Switzerland	0	Reuben Granich	Switzerland	0	2009	0	None	0	Universal voluntary HIV testing with immediate antiretroviral therapy as a strategy for elimination of HIV transmission: a mathematical model	yes	does not apply	not given	NA
3	Lancet	Abdisalan M Noor	Kenya	0	Abdisalan M Noor	Kenya	0	2009	0	Wellcome Trust	0	Insecticide-treated net coverage in Africa: mapping progress in 2000–07	yes	does not apply	not given	NA
4	Lancet	ASTEC Study Group	.		A M C Swart	UK	0	2009	0	Medical Research Council and National Cancer Research Network	0	Efficacy of systematic pelvic lymphadenectomy in endometrial cancer (MRC ASTEC trial): a randomised study	yes	does not apply	not given	NA
5	Lancet	ASTEC/EN. 5 Study Group	.		A M C Swart	UK	0	2009	0	Medical Research Council and National Cancer Research Network, National Cancer Institute of Canada, Canadian Cancer Society	0	Adjuvant external beam radiotherapy in the treatment of endometrial cancer (MRC ASTEC and NCIC CTG EN.5 randomised trials): pooled trial results, systematic review, and meta-analysis	yes	does not apply	not given	NA
6	Lancet	sami pirkola	Finland	0	sami pirkola	Finland	0	2009	0	academy of finland	0	Community mental-health services and suicide rate in Finland: a nationwide small-area analysis	yes	does not apply	not given	NA
7	Lancet	Corine J van Marrewijk	Netherlands	0	Corine J van Marrewijk	Netherlands	0	2009	0	netherlands organisation of health research and development	0	Effect and cost-effectiveness of step-up versus step-down treatment with antacids, H2-receptor antagonists, and proton pump inhibitors in patients with new onset dyspepsia (DIAMOND study): a primary-care-based randomised controlled trial	yes	does not apply	not given	NA
8	Lancet	robert carr	UK	0	robert carr	UK	0	2009	0	action medical research	0	Granulocyte-macrophage colony stimulating factor administered as prophylaxis for reduction of sepsis in extremely preterm, small for gestational age neonates (the PROGRAMS trial): a single-blind, multicentre, randomised controlled trial	yes	does not apply	not given	NA
9	Lancet	paul lichtenstein	Sweden	0	paul lichtenstein	Sweden	0	2009	0	Swedish Council for Working Life and Social Research, and the Swedish Research Council.	0	Common genetic determinants of schizophrenia and bipolar disorder in Swedish families: a population-based study	yes	no	not given	NA
10	Lancet	A Cameron	Switzerland	0	A Cameron	Switzerland	0	2009	0	none	0	Medicine prices, availability, and affordability in 36 developing and middle-income countries: a secondary analysis	yes	does not apply	not given	NA
1	Molecular and Cellular Proteomics	joohyun lee	USA	1	bret cooper	USA	1	2009	1	dept of energy. John hopkins and USDA-ARS	0	Quantitative Proteomic Analysis of Bean Plants Infected by a Virulent and Avirulent Obligate Rust Fungus	yes	yes	given	not deposited
2	Molecular and Cellular Proteomics	jhan jonas filen	Finland	0	riitta lahesmaa	Finland	0	2009	0	National Technology Agency of Finland (TEKES), Academy of Finland, Sigrid Juselius Foundation, Turku University Hospital Fund, Finnish Cultural Foundation, Väinö and Laina Kivi Foundation, Tampere Tuberculosis Foundation, and Ida Montin Foundation	0	Quantitative Proteomics Reveals GIMAP Family Proteins 1 and 4 to Be Differentially Regulated during Human T Helper Cell Differentiation	yes	yes	given	not deposited
3	Molecular and Cellular Proteomics	zhongyi cheng	USA	1	WEI GU	USA	1	2009	1	NIH, NCI	0	Molecular Characterization of Propionyllysines in Non-histone Proteins	yes	yes	given	not deposited
4	Molecular and Cellular Proteomics	sangtae kim	USA	1	pavel a pevzner	USA	1	2009	1	NIH	0	Spectral Dictionaries: Integrating de novo Peptide Sequencing with Database Search of Tandem Mass Spectra Spectral Dictionaries: Integrating de novo Peptide Sequencing with Database Search of Tandem Mass Spectra Spectral Dictionaries: Integrating de novo Peptide Sequencing with Database Search of Tandem Mass Spectra	yes	yes	given	not deposited
5	Molecular and Cellular Proteomics	rui liu	China	0	canhua huang	China	0	2009	0	Basic Research Program of China, National Natural Science Foundation of China, National 863 High Tech Foundation	0	Mechanism of Cancer Cell Adaptation to Metabolic Stress: Proteomics Identification of a Novel Thyroid Hormone-mediated Gastric Carcinogenic Signaling Pathway	yes	no	not given	not deposited
6	Molecular and Cellular Proteomics	Katherine G. Zulak	USA	1	Peter J. Facchini	USA	1	2009	1	Natural Sciences and Engineering Research Council	0	Plant Defense Responses in Opium Poppy Cell Cultures Revealed by Liquid Chromatography-Tandem Mass Spectrometry Proteomics	yes	yes	given	not deposited
7	Molecular and Cellular Proteomics	Atsushi Kuno	Japan	0	Jun Hirabayashi	Japan	0	2009	0	New Energy and Industrial Technology Development Organization, Japan	0	Focused Differential Glycan Analysis with the Platform Antibody-assisted Lectin Profiling for Glycan-related Biomarker Verification	yes	yes	not given	lectins given
8	Molecular and Cellular Proteomics	Jason Mulvenna	Austrailia	0	frey J. Gorman	Austrailia	0	2009	1	National Health and Medical Research Council, Australia (NHMRC	0	Proteomics Analysis of the Excretory/Secretory Component of the Blood-feeding Stage of the Hookworm, Ancylostoma caninum	yes	yes	given	deposited
9	Molecular and Cellular Proteomics	Diliana Dancheva Simeonova	Germany	0	Michael Przybylski	Germany	0	2009	0	Deutsche Forschungsgemeinschaft	0	Unknown Genome" Proteomics A New NAD(P)-dependent Epimerase/Dehydratase Revealed by N-terminal Sequencing, Inverted PCR, and High Resolution Mass Spectrometry*	yes	yes	not given	deposited
10	Molecular and Cellular Proteomics	Angel P. Diz	UK	0	David O. F. Skibinski	UK	0	2009	0	Marine Genomics Europe Network grant	0	Genetic Variation Underlying Protein Expression in Eggs of the Marine Mussel Mytilus edulis	yes	no	given	not deposited
1	Molecular Cell	nai yang fu	Singapore	0	victor c yu	Singapore	0	2009	0	A*STAR	0	Baxβ: A Constitutively Active Human Bax Isoform that Is under Tight Regulatory Control by the Proteasomal Degradation Mechanism	yes	no	not given	not deposited
2	Molecular Cell	shitao li	USA	1	martin e dorf	USA	1	2009	1	NIH	0	PKC Phosphorylation of TRAF2 Mediates IKKα/β Recruitment and K63-Linked Polyubiquitination	yes	no	not given	not deposited
3	Molecular Cell	rina barouch bentov	USA	1	kArsten sauer	USA	1	2009	0	Genomics Institute of the Novartis Research Foundation	0	A Conserved Salt Bridge in the G Loop of Multiple Protein Kinases Is Important for Catalysis and for In Vivo Lyn Function	yes	no	not given	not deposited
4	Molecular Cell	cristoph F kurat	Austria	0	sepp D kohlwein	Austria	0	2009	0	Austrian Science Fund, Austrian Federal Ministry for Science and Research	0	Cdk1/Cdc28-Dependent Activation of the Major Triacylglycerol Lipase Tgl4 in Yeast Links Lipolysis to Cell-Cycle Progression	yes	no	not given	not deposited
5	Molecular Cell	jungsan sohn	USA	1	robert t sauer	USA	1	2009	1	NIH	0	OMP Peptides Modulate the Activity of DegS Protease by Differential Binding to Active and Inactive Conformations	yes	no	not given	not deposited
6	Molecular Cell	hana cho	Korea	0	Yoon Ki Kim	Korea	0	2009	0	BioGreen 21 Program, Rural Development Administration, Republic of Korea, a grant of Seoul R&BD Program (NT070112), and a grant from the National R&D Program for Cancer Control, Ministry for Health, Welfare and Family affairs, Republic of Korea	0	Human Proline-Rich Nuclear Receptor Coregulatory Protein 2 Mediates an Interaction between mRNA Surveillance Machinery and Decapping Complex	yes	no	not given	not deposited
7	Molecular Cell	Jorge Henao-Mejia	USA	1	Jorge Henao-Mejia	USA	1	2009	1	NIH	0	Suppression of HIV-1 Nef Translation by Sam68 Mutant-Induced Stress Granules and nef mRNA Sequestration	yes	no	not given	not deposited
8	Molecular Cell	Rachel A. Mooney	USA	1	Robert Landick	USA	1	2009	1	nih usda	0	Regulator Trafficking on Bacterial Transcription Units In Vivo	yes	yes	not given	deposited
9	Molecular Cell	Takehiko Usui	USA	1	John H.J. Petrini	USA	1	2009	0	Leukemia and Lymphoma Society, the Joel and Joan Smilow Initiative	0	Maintenance of the DNA-Damage Checkpoint Requires DNA-Damage-Induced Mediator Protein Oligomerization	yes	no	not given	not deposited
10	Molecular Cell	Nayef Mazloum	USA	1	William K. Holloman	USA	1	2009	1	NIH	0	Second-End Capture in DNA Double-Strand Break Repair Promoted by Brh2 Protein of Ustilago maydis	yes	no	not given	not deposited
1	Nano letter	G. ctistis	Germany	0	G ctistis	Germany	0	2009	0	no funding	0	Optical and Magnetic Properties of Hexagonal Arrays of Subwavelength Holes in Optically Thin Cobalt Films	no	no policy	not given	NA
2	Nano letter	sujit S datta	USA	1	A T Charlie johnson	USA	1	2009	1	Nano/Bio Interface Center through the National Science Foundation	0	Surface Potentials and Layer Charge Distributions in Few-Layer Graphene Films	no	no policy	not given	NA
3	Nano letter	dzmitry a yarotski	USA	1	dzmitry a yarotski	USA	1	2009	0	the Los Alamos National Laboratory LDRD Program	0	scanniong tuneling microscopy of DNA wrapped carbon nanotubes	no	no policy	not given	NA
4	Nano letter	wooyoung shim	Korea	0	wooyoung shim	Korea	0	2009	0	National Core Research Center for Nanomedical Technology	0	on-film formation of bi nanowires with extraordinary electron mobility	no	no policy	not given	NA
5	Nano letter	F giannazzo	Italy	0	F giannazzo	Italy	0	2009	0	no funding	0	screening length and quantum capacitance in graphene by scanning probe microscopy	no	no policy	not given	NA
6	Nano letter	Alfonso Reina	USA	1	ging kong	USA	1	2009	1	NSF grants	0	Large Area, Few-Layer Graphene Films on Arbitrary Substrates by Chemical Vapor Deposition	no	no policy	not given	NA
7	Nano letter	aaron erdely	USA	1	Petia P. Simeonova	USA	1	2009	0	Ministry of Education, Culture, Sports, Science and Technology of Japan	0	Cross-Talk between Lung and Systemic Circulation during Carbon Nanotube Respiratory Exposure. Potential Biomarkers	no	no policy	not given	NA
8	Nano letter	Placidus B. Amama	USA	1	Benji Maruyama	USA	1	2009	1	Air Force Office of Scientific Research	0	Role of Water in Super Growth of Single-Walled Carbon Nanotube Carpets	no	no policy	not given	NA
9	Nano letter	Machteld I. van der Meulen	Ireland	0	Justin D. Holmes	USA	1	2009	0	Irish Research Council for Science, Engineering and Technology (IRCSET), Science Foundation Ireland	0	Single Crystalline Ge1-xMnx Nanowires as Building Blocks for Nanoelectronics	no	no policy	not given	NA
10	Nano letter	William A. Clay	USA	1	Zhi Liu	USA	1	2009	0	Chevron through the Stanford-Chevron Program on Diamondoid Nano-Science	0	Origin of the Monochromatic Photoemission Peak in Diamondoid Monolayers	no	no policy	not given	NA
1	Nat Physics	J. S. Lundeen	UK	0	I. A.Walmsley	UK	0	2009	0	QAP and STREP COMPAS, EPSRC, the Royal Society, Microsoft Research and EURYI award scheme	0	Tomography of quantum detectors	yes	does not apply	not given	NA
2	Nat Physics	Louis Taillefer	USA	1	Louis Taillefer	USA	1	2009	1	NSERC, FQRNT, canada research chair, NSF and canadian institute for advanced research	0	Linear temperature dependence of resistivity and change in the Fermi surface at the pseudogap critical point of a high-Tc superconductor	yes	does not apply	not given	NA
3	Nat Physics	Ophir M. Auslaender	USA	1	Ophir M. Auslaender	USA	1	2009	1	US-Israel binational science foundation, DOE, AFOSR	0	Mechanics of individual isolated vortices in a cuprate superconductor	yes	no	not given	NA
4	Nat Physics	K. Sugawara	Japan	0	T. Sato	Japan	0	2009	0	JSPS, JST-CREST, MEXT of Japan	0	Fermi-surface-dependent superconducting gap in C6Ca	yes	does not apply	not given	NA
5	Nat Physics	Minoru Yamashita	Japan	0	Minoru Yamashita	Japan	0	2009	0	JSPS and Global COE program Japan	0	Thermal-transport measurements in a quantum spin-liquid state of the frustrated triangular magnet κ-(BEDT-TTF)2Cu2(CN)3	yes	does not apply	not given	NA
6	Nat Physics	sergey gladchenko	USA	1	micheal E gershenson	USA	1	2009	1	NSf andRutger's academic excellence award	0	Superconducting nanocircuits for topologically protected qubits	yes	does not apply	not given	NA
7	Nat Physics	larry luer	Italy	0	larry luer	Italy	0	2009	1	NSF and european commission	0	Size and mobility of excitons in (6, 5) carbon nanotubes	yes	does not apply	not given	NA
8	Nat Physics	ola al-hagan	USA	1	andrew james murray	UK	0	2009	0	EPSRC (UK) and NSf	0	Atomic and molecular signatures for charged-particle ionization	yes	does not apply	not given	NA
9	Nat Physics	russel fung	USA	1	abbas ourmazd	USA	1	2009	0	no funding	0	Structure from fleeting illumination of faint spinning objects in flight	yes	does not apply	not given	NA
10	Nat Physics	sung yoon chung	Korea	0	youn-joong kim	Korea	0	2009	0	Korea research fund	0	Multiphase transformation and Ostwald's rule of stages during crystallization of a metal phosphate	yes	yes	not given	NA
1	Nature	Andrea Viae	Italy	0	Andrea Viae	Italy	0	2009	0	the Italian Association on Cancer Research(AIRC), Ministero Italiano della Salute, Cariplo and the European Community (FP6:EPITRON and GENICA) to P.G.P. A.V. is a fellow of the Vollaro Foundation	0	Cell-cycle restriction limits DNA damage and maintains self-renewal of leukaemia stem cells	yes	no	not given	not deposited
2	Nature	Xiao, Andrew	USA	1	Allis, David C	USA	1	2009	1	NCI	0	WSTF regulates the H2A.X DNA damage response via a novel tyrosine kinase activity.	yes	no	not given	not deposited
3	Nature	Hani Zaher	USA	1	Rachel Green1	USA	1	2009	1	NIH	0	Quality control by the ribosome following peptide bond formation p161	yes	no	not given	not deposited
4	Nature	llison D. Ebert	USA	1	Clive N. Svendsen	USA	1	2009	1	Amyotrophic Lateral Sclerosis Association (to C.N.S.), the National Institutes of Neurological Disorders and Stroke (P01NS057778 to C.N.S. and R01NS41584 to C.L.L.), National Institutes of Child Health and HumanDevelopment (R01HD054413 to C.L.L.), and National Institutes of General Medical Sciences (T32GM008396 for F.F.R.).	0	Induced pluripotent stem cells from a spinal muscular atrophy patient	yes	yes	not given	deposited
5	Nature	Michael Tri H. Do	USA	1	King-Wai Yau	USA	1	2009	1	NRSA fellowship and a VNTP Training Grant and NIH grants	0	Photon capture and signalling by melanopsin retinal ganglion cells	yes	yes	not given	NA
6	Nature	A R Stine	USA	1	A R Stine	USA	1	2009	1	Office of Science, US Department of Energy	0	Changes in the phase of the annual cycle of surface temperature	yes	no	not given	NA
7	Nature	toshiro oda	Japan	0	toshiro oda	Japan	0	2009	0	Kazato Research Foundation	0	The nature of the globular- to fibrous-actin transition	yes	yes	not given	NA
8	Nature	jeffrey R moffitt	USA	1	Carlos Bustamante	USA	1	2009	1	NIH	0	Intersubunit coordination in a homomeric ring ATPase	yes	no	not given	not deposited
9	Nature	andrew h peterson	USA	1	andrew h peterson	USA	1	2009	1	US National Science Foundation (NSF DBI-9872649, 0115903; MCB-0450260), International Consortium for Sugarcane Biotechnology, National Sorghum Producers, and a John Simon Guggenheim Foundation fellowship to A.H.P.; US Department of Energy	0	The Sorghum bicolor genome and the diversification of grasses	yes	no	not given	not deposited
10	Nature	joseph c sun	USA	1	Lewis L. Lanier	USA	1	2009	1	NIH	0	Adaptive immune features of natural killer cells	yes	no	not given	not deposited
1	Nature Biotechnology	W Nicholson Price II	USA	1	John F Hunt	USA	1	2009	1	NIH, NGO	0	Understanding the physical properties that control protein crystallization by analysis of large-scale experimental data	yes	yes	given	NA
2	Nature Biotechnology	Kevin D Foust	USA	1	Brian K Kaspar	USA	1	2009	1	NIH, NGO	0	Intravascular AAV9 preferentially targets neonatal neurons and adult astrocytes	yes	no	not given	not deposited
3	Nature Biotechnology	Joel Rozowsky	USA	1	Joel Rozowsky	USA	1	2009	1	NIH	0	PeakSeq enables systematic scoring of ChIP-seq experiments relative to controls	yes	yes	given	NA
4	Nature Biotechnology	Jinyan Du	USA	1	Todd R Golub	USA	1	2009	1	NCI, NGO	0	Bead-based profiling of tyrosine kinase phosphorylation identifies SRC as a potential target for glioblastoma therapy	yes	yes	given	deposited
5	Nature Biotechnology	Adlen Foudi	USA	1	Hanno Hock	USA	1	2009	1	NIH, University, NGO	0	Analysis of histone 2B-GFP retention reveals slowly cycling hematopoietic stem cells	yes	no	not given	not deposited
6	Nature Biotechnology	Tamra E Werbowetski-Ogilvie	Canada	0	Mickie Bhatia	Canada	0	2009	0	Canadian Institute of Health Research, the National Cancer Institute of Canada (NCIC), Ontario Institute of Cancer Research (OICR) and the Canadian Cancer Society (CCS).	0	Characterization of human embryonic stem cells with features of neoplastic progression	yes	yes	given	deposited
7	Nature Biotechnology	yoshimi koroiwa	Japan	0	James M Robl	USA	1	2009	0	Hematech Inc	1	Antigen-specific human polyclonal antibodies from hyperimmunized cattle	yes	no	not given	not deposited
8	Nature Biotechnology	andreas gnirke	USA	1	andreas gnirke	USA	1	2009	1	National Human Genome Research Institute	0	Solution hybrid selection with ultra-long oligonucleotides for massively parallel targeted sequencing	yes	no	not given	not deposited
9	Nature Biotechnology	vincent A fusaro	USA	1	Steven A Carr	USA	1	2009	1	NSF, Technologies Assessment in Cancer Program, the National Heart, Lung, and Blood Institute, U01-HL081341 and The Women's Cancer Research Fund	0	Prediction of high-responding peptides for targeted protein assays by mass spectrometry	yes	yes	given	deposited
10	Nature Biotechnology	ian w taylor	Canada	0	Jeffrey L Wrana	Canada	0	2009	0	Natural Sciences and Engineering Research Council of Canada	0	Dynamic modularity in protein interaction networks predicts breast cancer outcome	yes	no	not given	deposited
1	Nature Cell Biology	Aaron J. Tooley	USA	1	Matthew F. Krummel	USA	1	2009	1	NIH, sandlers family fund, the national science foundation, the leukemia and lymphoma society	0	Amoeboid T lymphocytes require the septin cytoskeleton for cortical integrity and persistent motility	yes	no	not given	NA
2	Nature Cell Biology	Samuel F. Bakhoum	USA	1	Duan A. Compton	USA	1	2009	1	NIH	0	Genome stability is ensured by temporal control of kinetochore–microtubule dynamics	yes	no	not given	not deposited
3	Nature Cell Biology	Chi-Hang Wong	Singapore	0	Hoi-Yeung Li, Cheng-Gee Koh	Singapore	0	2009	0	Academic research fund, Biomedical research council,A*STAR, singapore	0	Apoptotic histone modification inhibits nuclear transport by regulating RCC1	yes	no	not given	not deposited
4	Nature Cell Biology	Koichi Kobayashi	USA	1	Thomas N. Sato, Daniel S. Greenspan	USA	1	2009	1	NIH	0	Secreted Frizzled-related protein 2 is a procollagen C proteinase enhancer with a role in fibrosis associated with myocardial infarction	yes	no	not given	not deposited
5	Nature Cell Biology	Chuanxi Cai	USA	1	Hiroshima Takeshima, Jianjie Ma	USA	1	2009	1	NIH, Ministery of Education, Science, Sports and culture of Japan, AHA	0	MG53 nucleates assembly of cell membrane repair machinery	yes	no	not given	NA
6	Nature Cell Biology	Fuminori Tokunaga	Japan	0	Kazuhiro Iwai	Japan	0	2009	0	Grants-in-Aid from the Ministry of Education, Culture, Sports, Science and Technology of Japan (F.T., T.T. and K.I.), the Japan Health Sciences Foundation (F.T.) and the Naito Foundation (F.T.).	0	Involvement of linear polyubiquitylation of NEMO in NF-B activation	yes	no	not given	not deposited
7	Nature Cell Biology	alessandra rustighi	Italy	0	Giannino Del Sal	Italy	0	2009	0	Associazione Italiana per la Ricerca sul Cancro (AIRC), from Italian University and Research Ministerium (Cofin MIUR), from Friuli-Venezia-Giulia (regional grant), from Association for International Cancer Research	0	The prolyl-isomerase Pin1 is a Notch1 target that enhances Notch1 activation in cancer	yes	no	not given	not deposited
8	Nature Cell Biology	robert d bell	USA	1	Berislav V. Zlokovic	USA	1	2009	1	R37AG023084, R37NS34467 and Socratech LLC to BVZ, 1R43 AG02400 to NC and HL62572 and R42AG026950	0	SRF and myocardin regulate LRP-mediated amyloid- clearance in brain vascular cells	yes	no	not given	not deposited
9	Nature Cell Biology	qinghang liu	USA	1	Jeffery D. Molkentin	USA	1	2009	1	National Institutes of Health (J.D.M), the Fondation Leducq (Heart failure network grant to J.D.M), and the Howard Hughes Medical Institute.	0	Interaction between TAK1–TAB1–TAB2 and RCAN1–calcineurin defines a signalling nodal control point	yes	no	not given	not deposited
10	Nature Cell Biology	dorothea maetzel	Germany	0	Olivier Gires	Germany	0	2009	0	Deutsche Krebshilfe, Mildred-Scheel-Stiftung to M.M. and O.G. We are indebted to Jürgen Haas for technical help. We thank Wenlong Bai for FHL-2–GST constructs	0	Nuclear signalling by tumour-associated antigen EpCAM	yes	no	not given	not deposited
1	Nature Genetics	Gudmar Thorleifsson	Iceland	0	Gudmar Thorleifsson	Iceland	0	2009	1	European Community's Seventh Framework Programme, National Institutes of Health, the Johns Hopkins General Clinical Research Center, the National Center for Research Resources, Lundbeck Foundation Centre of Applied Medical Genomics for Personalized Disease Prediction, Prevention and Care (LUCAMP) and the Danish Health Research Council.	0	Genome-wide association yields new sequence variants at seven loci that associate with measures of obesity	yes	yes	not given	deposited
2	Nature Genetics	Cristen J Willer	USA	1	Joel N Hirschhorn	USA	1	2009	1	NIH, NCI, Govt entities in Europe, University, and Industry	0	Six new loci associated with body mass index highlight a neuronal influence on body weight regulation	yes	yes	not given	deposited
3	Nature Genetics	Chiara Sabatti	USA	1	Leena Peltonen	UK	0	2009	1	NIH, NHLBI, European Govt institutions	0	Genome-wide association analysis of metabolic traits in a birth cohort from a founder population	yes	yes	not given	deposited
4	Nature Genetics	Yurii S Aulchenko	Netherlands	0	Leena Peltonen	UK	0	2009	1	NIH, European Govt institutions, Industry	0	Loci influencing lipid levels and coronary heart disease risk in 16 European population cohorts	yes	yes	not given	deposited
5	Nature Genetics	Sekar Kathiresan	USA	1	Sekar Kathiresan	USA	1	2009	1	NIH, European Govt institutions	0	Common variants at 30 loci contribute to polygenic dyslipidemia	yes	yes	not given	deposited
6	Nature Genetics	rafael a irizarry	USA	1	rafael a irizarry	USA	1	2009	1	US National Institutes of Health grants	0	The human colon cancer methylome shows similar hypo- and hypermethylation at conserved tissue-specific CpG island shores	yes	yes	not given	deposited
7	Nature Genetics	weimin bi	USA	1	James R Lupski	USA	1	2009	0	Israeli Science Foundation (grant no. 270/04 to O.R. and an equipment grant), the Foundation Jérôme Lejeune, the Minerva Foundation with funding from the Federal German Ministry for Education and Research, German-Israeli collaboration grant Gr-1905, March of Dimes grant 6-FY07-388, collaborative BSF grant 2007081 (to O.R. and J.R.L.), a grant from the Paul Godfrey Research Foundation in Children'…	0	Increased LIS1 expression affects human and mouse brain development	yes	no	not given	not deposited
8	Nature Genetics	masayo harada	Japan	0	Haruhiko Koseki	Japan	0	2009	0	RIKEN Structural Genomics/Proteomics Initiative (RSGI) and the National Project on Protein Structural and Functional Analysis, Ministry of Education, Culture, Sports, Science and Technology of Japan (S.Y.) and US National Institutes of Health grant	0	FGF9 monomer–dimer equilibrium regulates extracellular matrix affinity and tissue diffusion	yes	no	not given	not deposited
9	Nature Genetics	julian f ayroles	USA	1	Trudy F C Mackay	USA	1	2009	1	the National Institutes of Health	0	Systems genetics of complex traits in Drosophila melanogaster	yes	yes	not given	deposited
10	Nature Genetics	aaron d gitler	USA	1	aaron d gitler	USA	1	2009	1	National Institutes of Health Grant NS049221 and a grant from the American Parkinson Disease Association.	0	alpha-Synuclein is part of a diverse and highly conserved interaction network that includes PARK9 and manganese toxicity	yes	no	not given	not deposited
1	Nature Immunology	Shawn D Blackburn	USA	1	John Wherry	USA	1	2009	1	national institute of allergy and infectious disease	0	Coregulation of CD8+ T cell exhaustion by multiple inhibitory receptors during chronic viral infection	yes	yes	not given	NA
2	Nature Immunology	Srividya Sriskantharajah	UK	0	Steven C Ley	UK	0	2009	0	UK medical research council	0	proteolysis of nfk b1 p105 is essential for t cell receptor induced proliferation	yes	yes	given	deposited
3	Nature Immunology	xin yu	USA	1	jane l grogan	USA	1	2009	0	FACS lab	0	The surface protein TIGIT suppresses T cell activation by promoting the generation of mature immunoregulatory dendritic cells	yes	yes	given	deposited
4	Nature Immunology	irina l grigorova	USA	1	jason c cyster	USA	1	2009	1	NIH, Howard Hughes Medical Institute	0	Cortical sinus probing, S1P1-dependent entry and flow-based capture of egressing T cells	yes	yes	given	deposited
5	Nature Immunology	tom cupedo	Netherlands	0	tomcupedo	Netherlands	0	2009	0	The Netherlands Organization for Scientific Research	0	Human fetal lymphoid tissue–inducer cells are interleukin 17–producing precursors to RORC+ CD127+ natural killer–like cells	yes	yes	given	deposited
6	Nature Immunology	carmelo luci	France	0	elena tomasello	France	0	2009	0	National Cancer Institute, Genoa, Italy, Central Institute for Experimental Animals, Institut Universitaire de France	0	Influence of the transcription factor RORt on the development of NKp46+ cell populations in gut and skin	yes	yes	given	deposited
7	Nature Immunology	stephanie l sanos	Germany	0	Andreas Diefenbach	Germany	0	2009	0	Deutsche Forschungsgemeinschaft, National Institute for Medical Research Mill Hill	0	RORt and commensal microflora are required for the differentiation of mucosal interleukin 22–producing NKp46+ cells	yes	yes	given	deposited
8	Nature Immunology	alejandro villagra	USA	1	alejandro villagra	USA	1	2009	1	US Public Health Service	0	The histone deacetylase HDAC11 regulates the expression of interleukin 10 and immune tolerance	yes	yes	given	deposited
9	Nature Immunology	monika prruenster	Austria	0	antal rot	Austria	0	2009	0	European Union Sixth Framework Programme, Deutsche Forschungsgemeinschaft, Else-Kröner Fresenius Stiftung	0	The Duffy antigen receptor for chemokines transports chemokines and supports their promigratory activity	yes	yes	given	deposited
10	Nature Immunology	Jochen C Hartner1	USA	1	stuart h orkin	USA	1	2009	0	Leukemia and Lymphoma Society and the Howard Hughes Medical Institute	0	ADAR1 is essential for the maintenance of hematopoiesis and suppression of interferon signaling	yes	yes	given	deposited
1	Nature Materials	georg m muller	Germany	0	markus munzenberg	Germany	0	2009	0	Deutsche Forschungsgemeinschaft , NSF, oNR, NSF MRSEC	0	Spin polarization in half-metals probed by femtosecond spin excitation	yes	does not apply	not given	NA
2	Nature Materials	zhijan hu	Belgium	0	alain m jonas	Belgium	0	2009	0	Fondation Louvain (Fonds de Recherche Solvay), the Communauté Française de Belgique	0	Regular arrays of highly ordered ferroelectric polymer nanostructures for non-volatile low-voltage memories	yes	does not apply	not given	NA
3	Nature Materials	marina sofos	USA	1	samuel I stupp	USA	1	2009	1	US Department of Energy . National Science Foundation	0	A synergistic assembly of nanoscale lamellar photoconductor hybrids	yes	does not apply	not given	NA
4	Nature Materials	xinchen wang	Germany	0	xinchen wang	Germany	0	2009	0	Max Planck Society, Research and Development in a New Interdisciplinary Field Based on Nanotechnology and Materials Science programs of the Ministry of Education, Culture, Sports, Science and Technology (MEXT) of Japan	0	A metal-free polymeric photocatalyst for hydrogen production from water under visible light	yes	does not apply	not given	NA
5	Nature Materials	Tom Nilges	Germany	0	Tom Nilges	Germany	0	2009	0	Deutsche Forschungsgemeinschaft (DFG), Sonderforschungsbereich	0	Reversible switching between p- and n-type conduction in the semiconductor Ag10Te4Br3	yes	does not apply	not given	NA
6	Nature Materials	A. J. Drew	Switzerland	0	A. J. Drew	Switzerland	0	2009	0	Schweizer Nationalfonds (SNF) Nos 200021-111690 and 200020-119784 and the NCCR Materials with Novel Electronic Properties (MaNEP) programme	0	Direct measurement of the electronic spin diffusion length in a fully functional organic spin|[nbsp]|valve by low-energy muon spin rotation	yes	does not apply	not given	NA
7	Nature Materials	Mirko Cinchetti	Germany	0	Mirko Cinchetti	Germany	0	2009	1	NSF under Grant No. DMR-0602870 and by DFG Research Grant No. AE 19/8-2.	0	Determination of spin injection and transport in a ferromagnet/organic semiconductor heterojunction by two-photon photoemission	yes	does not apply	not given	NA
8	Nature Materials	M armand	France	0	M armand	France	0	2009	0	none	0	Conjugated dicarboxylate anodes for Li-ion batteries	yes	does not apply	not given	NA
9	Nature Materials	Sang Hoon Joo	USA	1	Gabor A. Somorjai	USA	1	2009	1	Director, Office of Science, Office of Basic Energy Sciences, Division of Chemical Sciences, Geological and Biosciences and Division of Materials Sciences and Engineering of the U.S. Department of Energy under contract No. DE-AC02-05CH11231	0	Thermally stable Pt/mesoporous silica core–shell nanocatalysts for high-temperature reactions	yes	does not apply	not given	NA
10	Nature Materials	Ilkeun Lee	USA	1	Francisco Zaera	USA	1	2009	1	US National Science Foundation	0	Tuning selectivity in catalysis by controlling particle shape	yes	does not apply	not given	NA
1	Nature Medicine	Maria Florencia Delgado1	Argentina.	0	Fernando P Polack	USA	1	2009	0	AI-054952 (F.P.P.) and the Thomas and Carol McCann Innovative Research Fund for Asthma and Respiratory Diseases	0	Lack of antibody affinity maturation due to poor Toll-like receptor stimulation leads to enhanced respiratory syncytial virus disease	yes	no	not given	NA
2	Nature Medicine	Krisztián Németh	USA	1	Éva Mezey	USA	1	2009	1	the intramural programs of the NIDCR and the NIDDK, NIH.	0	Bone marrow stromal cells attenuate sepsis via prostaglandin E2–dependent reprogramming of host macrophages to increase their interleukin-10 production	yes	no	not given	NA
3	Nature Medicine	Pedro J Real	USA	1	Adolfo Ferrando	USA	1	2009	1	US National Institutes of Health (R01CA120196 and R01CA129382 to A.F. and R56AI070310, 1R01CA105129 and 1R01CA133379 to I.A.); the Wipe Out Leukemia Forever Foundation (A.F.), the Leukemia and Lymphoma Society (grants 1287-08 and 6237-08 to A.F.), the Charlotte Geyer Foundation (A.F.), the Cancer Research Institute (A.F.), the Swim Across America Foundation (A.F.), the Golfers Against Cancer Foun…	0	gamma-secretase inhibitors reverse glucocorticoid resistance in T cell acute lymphoblastic leukemia	yes	yes	not given	given
4	Nature Medicine	Ulrike Stein	USA	1	Ulrike Stein	USA	1	2009	0	Wilhelm-Sander- Foundation, Germany.	0	MACC1, a newly identified key regulator of HGF-MET signaling, predicts colon cancer metastasis	yes	yes	not given	given
5	Nature Medicine	Pierre Farmer	Switzerland	0	Mauro Delorenzi	Switzerland	0	2009	0	Fondation Medic, Fondation Widmer, Oncosuisse, Swiss National Science Foundation and Swiss National Center for Competence in Research (NCCR) Molecular Oncology, EORTC Translational Research Fund, Swedish Cancer Society, ing Gustav the Fifth Jubilee Fund and Swedish Research Council for financial support	0	A stroma-related gene signature predicts resistance to neoadjuvant chemotherapy in breast cancer	yes	yes	not given	given
6	Nature Medicine	kristina lorenz	Germany	0	kristina lorenz	Germany	0	2009	0	Deutsche Forschungsgemeinschaft, the Leducq Foundation and the Fonds der Chemischen Industrie.	0	A new type of ERK1/2 autophosphorylation causes cardiac hypertrophy	yes	no	not given	not deposited
7	Nature Medicine	jean bernard menant	USA	1	Joseph J LoTurco	USA	1	2009	1	US National Institutes of Health (MH056524 and NS062416 to J.J.L.) and the Jerome Lejeune foundation	0	Dcx reexpression reduces subcortical band heterotopia and seizure threshold in an animal model of neuronal migration disorder	yes	no	not given	not deposited
8	Nature Medicine	julia skokowa	Germany	0	julia skokowa	Germany	0	2009	1	Elternverein Krebskranker Kinder Hannover e.V., Madeleine-Schickedanz-Kinderkrebsstiftung, Deutsche José Carreras Leukämia Stiftung e.V., REBIRTH Excellence Cluster (A.S.), Else Kröner Foundation (A.S.), an American Federation for Aging Research senior postdoctoral fellowship (F.W.) and the US Department of Agriculture and National Institutes of Health (Q.T.).	0	NAMPT is essential for the G-CSF–induced myeloid differentiation via a NAD+–sirtuin-1–dependent pathway	yes	no	not given	not deposited
9	Nature Medicine	kathy jaworski	USA	1	Hei Sook Sul	USA	1	2009	1	the US National Institutes of Health to H.S.S. and DK59635	0	AdPLA ablation increases lipolysis and prevents obesity induced by high-fat feeding or leptin deficiency	yes	yes	not given	deposited
10	Nature Medicine	benjamin kleavland	USA	1	Mark L Kahn	USA	1	2009	1	Swiss National Science Foundation, a Network of Excellence grant from the European Community (M.A.) and the US National Institutes of Health grants	0	Regulation of cardiovascular development and integrity by the heart of glass–cerebral cavernous malformation protein pathway	yes	no	not given	not deposited
1	Nature Methods	Kavitha Venkatesan	USA	1	mark vidal	USA	1	2009	1	US National Human Genome Research Institute, US national cancer institute, NIH, postdoctoral grant	0	An empirical framework for binary interactome mapping	yes	no	given	in appendix
2	Nature Methods	pascal braun	USA	1	mark vidal	USA	1	2009	1	NIH, W.M. Keck Foundation , Ellison Foundation , Dana-Farber Cancer Institute Strategic Initiative	0	An experimentally derived confidence score for binary protein-protein interactions	yes	no	given	in appendix
3	Nature Methods	derek Y chiang	USA	1	eric S lander	USA	1	2009	1	NIH	0	High-resolution mapping of copy-number alterations with massively parallel sequencing	yes	no	given	in appendix
4	Nature Methods	Alison M Skelley	USA	1	Joel Voldman	USA	1	2009	1	NIH, US National Aeronautics and Space Administration	0	Microfluidic control of cell pairing and fusion	yes	no	given	NA
5	Nature Methods	Fedor V Subach	USA	1	Vladislav V Verkhusha	USA	1	2009	1	NIH	0	Photoactivatable mCherry for high-resolution two-color fluorescence microscopy	yes	no	given	in appendix
6	Nature Methods	jim berg	USA	1	gary yellen	USA	1	2009	1	US National Institutes of Health –National Institute of Neurological Disorders and Stroke	0	A genetically encoded fluorescent reporter of ATP:ADP ratio	yes	yes	not given	NA
7	Nature Methods	Takeshi Itabashi	Japan	0	Shin'ichi Ishiwata	Japan	0	2009	0	Grant-in-Aid for Young Scientists (B) and Grant-in-Aid for Scientific Research on Priority Areas (T.I.), and Grant-in-Aid for Scientific Research (A), The 21st Century Center Of Excellence program and "Establishment of Consolidated Research Institute for Advanced Science and Medical Care" from the Ministry of Education, Culture, Sports, Science and Technology of Japan (S.I.), and a Research Grant…	0	Probing the mechanical architecture of the vertebrate meiotic spindle	yes	yes	not given	NA
8	Nature Methods	oliver G S ayling	Canada	0	timothy h murphy	Canada	0	2009	0	operating grants to T.H.M. (MOP-12675) and the In Vivo Imaging Centre from the Canadian Institutes of Health Research	0	Automated light-based mapping of motor cortex by photoactivation of channelrhodopsin-2 transgenic mice	yes	no	not given	NA
9	Nature Methods	Sandra Dorsch	Germany	0	Moritz Bünemann1	Germany	0	2009	0	Deutsche Forschungsgemeinschaft	0	Analysis of receptor oligomerization by FRAP microscopy	yes	no	not given	not deposited
10	Nature Methods	Jay R Hesselberth	USA	1	John A Stamatoyannopoulos	USA	1	2009	1	US National Institutes of Health grants R01GM071923 and U54HG004592 to J.A.S., and P41RR11823 to S.F. and W.S.N.; X.C. was supported by a fellowship from the Natural Sciences and Engineering Research Council of Canada	0	Global mapping of protein-DNA interactions in vivo by digital genomic footprinting	yes	no	given	not deposited
1	Nature Neuroscience	Rachel M Huckfeldt	USA	1	Rachel O L Wong	USA	1	2009	1	NIH, fellowship award	0	Transient neurites of retinal horizontal cells exhibit columnar tiling via homotypic interactions	yes	yes	not given	NA
2	Nature Neuroscience	Claudio Punzo	USA	1	Constance L Cepko	USA	1	2009	1	NIH, Macular Vision Research Foundation, Foundation for Retinal Research, Howard Hughes Medical Institute, Merck and by an EMBO fellowship	0	Stimulation of the insulin/mTOR pathway delays cone death in a mouse model of retinitis pigmentosa	yes	no	given	not deposited
3	Nature Neuroscience	Xu Liu	USA	1	Ronald L Davis	USA	1	2009	1	NIH, R. P. Doherty-Welch Chair in Science at the Baylor College of Medicine	0	The GABAergic anterior paired lateral neuron suppresses and is suppressed by olfactory learning	yes	yes	not given	NA
4	Nature Neuroscience	Claire E Le Pichon	USA	1	Stuart Firestein	USA	1	2009	1	National Institute on Deafness and Other Communication Disorders	0	Olfactory behavior and physiology are disrupted in prion protein knockout mice	yes	yes	not given	NA
5	Nature Neuroscience	Ian Nauhaus	USA	1	Dario L Ringach	USA	1	2009	1	NIH, DARPA, Stein Endowment Award, Scholar Award from the McKnight Endowment Fund for Neuroscience , Leopoldina fellowship	0	Stimulus contrast modulates functional connectivity in visual cortex	yes	yes	not given	NA
6	Nature Neuroscience	sonia j bishop	USA	1	sonia j bishop	USA	1	2009	0	UK Medical Research Council	0	Trait anxiety and impoverished prefrontal control of attention	yes	yes	not given	NA
7	Nature Neuroscience	Yosuke Morishima	Japan	0	Katsuyuki Sakai1	Japan	0	2009	0	Grant-in-Aid for Scientific Research (A) and a Grant-in-Aid for Young Scientists (S) from the Japan Society for the Promotion of Science, and a Grant-in-Aid from the Center of Excellence Program, Center for Brain Medical Science, from the Ministry of Education, Culture, Sports, Science and Technology, Japan.	0	Task-specific signal transmission from prefrontal cortex in visual selective attention	yes	yes	not given	NA
8	Nature Neuroscience	Masayuki Matsumoto	USA	1	Masayuki Matsumoto	USA	1	2009	1	Intramural Research Program at the National Institutes of Health, National Eye Institute	0	Representation of negative motivational value in the primate lateral habenula	yes	yes	not given	NA
9	Nature Neuroscience	milan joksimovic	USA	1	Rajeshwar B Awatramani	USA	1	2009	0	none	0	Wnt antagonism of Shh facilitates midbrain floor plate neurogenesis	yes	no	not given	not deposited
10	Nature Neuroscience	tarik regad	UK	0	Paolo Salomoni	UK	0	2009	0	UK Medical Research Council through a Medical Research Council Career Development Award (G120/919) held at the University of Cambridge Behavioral and Clinical Neuroscience Institute, with additional resources being provided by the Medical Research Council Cognition and Brain Sciences Unit	0	The tumor suppressor Pml regulates cell fate in the developing neocortex	yes	no	not given	not deposited
1	Nature Structural & Molecular Biology	Helena Santos-Rosa	UK	0	Tony Kouzarides	UK	0	2009	0	none	0	Histone H3 tail clipping regulates gene expression	yes	no	not given	not deposited
2	Nature Structural & Molecular Biology	Seong-Yeon Park	Korea	0	V Narry Kim	Korea	0	2009	0	Creative Research Initiatives Program , Ministry of Education, Science and Technology of the Republic of Korea.	0	miR-29 miRNAs activate p53 by targeting p85 and CDC42	yes	no	not given	not deposited
3	Nature Structural & Molecular Biology	Amer Alam	USA	1	Youxing Jiang	USA	1	2009	1	NIH, Howard Hughes Medical Institute	0	High-resolution structure of the open NaK channel	yes	yes	not given	deposited
4	Nature Structural & Molecular Biology	Amer Alam	USA	1	Youxing Jiang	USA	1	2009	1	NIH, Howard Hughes Medical Institute, National Institute of General Medical Science	0	Structural analysis of ion selectivity in the NaK channel	yes	yes	not given	NA
5	Nature Structural & Molecular Biology	Corina Maeder	USA	1	Christine Guthrie	USA	1	2009	1	NIH, National Institutes of General Medical Sciences postdoctoral fellowship	0	ATP-dependent unwinding of U4/U6 snRNAs by the Brr2 helicase requires the C terminus of Prp8	yes	no	not given	not deposited
6	Nature Structural & Molecular Biology	Andrea B Eberle	Switzerland	0	Oliver Mühlemann	Switzerland	0	2009	0	Danish National Research Foundation and the Danish Natural Science Research Council (S.L.-A. and T.H.J.), and by the Swiss National Science Foundation, the Max Cloëtta Foundation and a Starting Grant of the European Research Council	0	SMG6 promotes endonucleolytic cleavage of nonsense mRNA in human cells	yes	no	not given	not deposited
7	Nature Structural & Molecular Biology	Daneen Schaeffer	USA	1	Ambro van Hoof	USA	1	2009	1	Pew Scholarship Program in the Biomedical Sciences and by the National Institutes of Health	0	The exosome contains domains with specific endoribonuclease, exoribonuclease and cytoplasmic mRNA decay activities	yes	no	not given	not deposited
8	Nature Structural & Molecular Biology	Stefan Rothenburg	USA	1	Stefan Rothenburg	USA	1	2009	1	Intramural Research Program of the US National Institutes of Health, NICHD	0	Rapid evolution of protein kinase PKR alters sensitivity to viral inhibitors	yes	yes	not given	deposited
9	Nature Structural & Molecular Biology	Yuval Ben-Abu	Israel	0	Ofer Yifrach	Israel	0	2009	0	Bi-national (US-Israel) Science Foundation and israel science foundation	0	Inverse coupling in leak and voltage-activated K+ channel gates underlies distinct roles in electrical signaling	yes	does not apply	not given	NA
10	Nature Structural & Molecular Biology	Roman Fedorov	Germany	0	Dietmar J Manstein	Germany	0	2009	0	none	0	The mechanism of pentabromopseudilin inhibition of myosin motor activity	yes	yes	not given	deposited
1	NEJM	Cyril Moers	Netherlands	0	Cyril Moers	Netherlands	0	2009	0	Organ Recovery System	1	Machine Perfusion or Cold Storage in Deceased-Donor Kidney Transplantation	yes	no	not given	NA
2	NEJM	A.M.G.A. de Smet	Netherlands	0	A.M.G.A. de Smet	Netherlands	0	2009	0	none	0	Decontamination of the Digestive Tract and Oropharynx in ICU Patients	yes	yes	not given	NA
3	NEJM	Kaan Boztug	Germany	0	hristoph Klein	Germany	0	2009	0	Deutsche Forschungsgemeinschaft (DFG KliFo 110-2, to Dr. Klein), the Junior Research Group "Glycomics" (to Dr. Gerardy-Schahn), the Bundesministerium für Bildung und Forschung Bone Marrow Failure Syndromes (to Drs. Welte and Klein), and the European Union (MEXT-CT-2006-042316, to Dr. Grimbacher); and by the Intramural Research Program of the National Institutes of Health, National Library of Medi…	0	A Syndrome with Congenital Neutropenia and Mutations in G6PC3	yes	no	not given	not deposited
4	NEJM	Jerry R. Greenfield	UK	0	I. Sadaf Farooqi	UK	0	2009	0	grants from the National Health and Medical Research Council of Australia, the Royal Australasian College of Physicians, and St. Vincent's Clinic Foundation, Sydney (to Dr. Greenfield); from the Wellcome Trust and the Cambridge Biomedical Research Centre of the National Institute for Health Research (to Drs. O'Rahilly and Farooqi); and from the Medical Research Council (to Drs. O'Rahilly, Brage, …	0	Modulation of Blood Pressure by Central Melanocortinergic Pathways	yes	no	not given	NA
5	NEJM	Robert S. Weinstein	USA	1	Robert S. Weinstein	USA	1	2009	1	Department of Veterans Affairs Merit Review Grants, a grant (P01-AG13918) from the National Institutes of Health, and Tobacco Settlement Funds provided by the College of Medicine of the University of Arkansas for Medical Sciences. The original clinical trial, which included transilial bone-biopsy specimens, was supported by Merck.	0	Giant Osteoclast Formation and Long-Term Oral Bisphosphonate Therapy	yes	no	not given	NA
6	NEJM	Alan T N tita	USA	1	Alan T N tita	USA	1	2009	1	National Institute of Child Health and Human Development (NICHD).	0	Timing of Elective Repeat Cesarean Delivery at Term and Neonatal Outcomes Timing of Elective Repeat Cesarean Delivery at Term and Neonatal Outcomes	yes	no	not given	NA
7	NEJM	Long-De Wang	China	0	Xiao-Nong Zhou	China	0	2009	0	Chinese Ministry of Health, and by the Chinese National Natural Science Foundation	0	A Strategy to Control Transmission of Schistosoma japonicum in China A Strategy to Control Transmission of Schistosoma japonicum in China	yes	no	not given	NA
8	NEJM	William duckworth	USA	1	william duckworht	USA	1	2009	1	Veterans Affairs Cooperative Studies Program, Department of Veterans Affairs Office of Research and Development; the American Diabetes Association; and the National Eye Institute. Pharmaceutical and other supplies and financial assistance were provided by GlaxoSmithKline, Novo Nordisk, Roche Diagnostics, Sanofi-Aventis, Amylin, and Kos Pharmaceuticals	0	Glucose Control and Vascular Complications in Veterans with Type 2 Diabetes	yes	no	not given	NA
9	NEJM	Micheal P W Grocott	UK	0	Micheal P W grocott	UK	0	2009	0	Centre for Altitude, Space, and Extreme Environment Medicine, University College London	0	Arterial Blood Gases and Oxygen Content in Climbers on Mount Everest	yes	no	not given	NA
10	NEJM	Pim A L Tonino	Netherlands	0	Nico H.J. Pijls	Netherlands	0	2009	0	Radi Medical Systems and Stichting Vrienden van het Hart Zuidoost Brabant. Medtronic provided limited financial support to some centers by tailoring the price of the Endeavor stents to the local reimbursement system.	1	Fractional Flow Reserve versus Angiography for Guiding Percutaneous Coronary Intervention	yes	no	not given	NA
1	Neuron	yukako yukota	USA	1	E S ANTON	USA	1	2009	1	NIH	0	The Adenomatous Polyposis Coli Protein Is an Essential Regulator of Radial Glial Polarity and Construction of the Cerebral Cortex p42	yes	no	not given	not deposited
2	Neuron	julia a kaye	USA	1	noelle d letoile	USA	1	2009	1	NIH	0	A 3′UTR Pumilio-Binding Element Directs Translational Activation in Olfactory Sensory Neurons	yes	no	not given	not deposited
3	Neuron	yi-rong peng	China	0	xiang yu	China	0	2009	0	N.I.M.H	0	Coordinated Changes in Dendritic Arborization and Synaptic Strength during Neural Circuit Development	yes	no	not given	not deposited
4	Neuron	jacek jaworski	Netherlands	0	casper C hoogenraad	Netherlands	0	2009	0	Netherlands Organization for Scientific Research	0	Dynamic Microtubules Regulate Dendritic Spine Morphology and Synaptic Plasticity	yes	no	not given	not deposited
5	Neuron	megumi morimoto-tomita	USA	1	susumu tomita	USA	1	2009	1	NIH, Yale start-up funds, the Esther A. & Joseph Klingenstein Fund, and the Edward Mallinckrodt Jr. Found	0	Autoinactivation of Neuronal AMPA Receptors via Glutamate-Regulated TARP Interaction	yes	no	not given	not deposited
6	Neuron	Justin L. Shobe	USA	1	Thomas J. Carew1	USA	1	2009	1	NIH nad NSF grant	0	Temporal Phases of Activity-Dependent Plasticity and Memory Are Mediated by Compartmentalized Routing of MAPK Signaling in Aplysia Sensory Neurons	yes	no	not given	not deposited
7	Neuron	Guillaume P. Dugué	France	0	Stéphane Dieudonné	France	0	2009	0	ANR (05-Neur-030), CNRS, INSERM, ENS, NSERC, and NAAR	0	Electrical Coupling Mediates Tunable Low-Frequency Oscillations and Resonance in the Cerebellar Golgi Cell Network	yes	does not apply	not given	NA
8	Neuron	Vasily Klucharev	Netherlands	0	Vasily Klucharev	Netherlands	0	2009	0	Erasmus Research Institute of Management (ERIM).	0	Reinforcement Learning Signal Predicts Social Conformity	yes	does not apply	not given	NA
9	Neuron	Thomas Bozza	USA	1	Thomas Bozza	USA	1	2009	1	NIDCD	0	Mapping of Class I and Class II Odorant Receptors to Glomerular Domains by Two Distinct Types of Olfactory Sensory Neurons in the Mouse	yes	yes	not given	NA
10	Neuron	Akishi Onishi	USA	1	Seth Blackshaw	USA	1	2009	1	supported by R01EY017015, an Alfred P. Sloan Young Investigator Award, and a W.M. Keck Distinguished Young Scholar in Medical Research Award (to S.B.), research fellowships from the Japan Society for the Promotion of Science for Young Scientists	0	Pias3-Dependent SUMOylation Directs Rod Photoreceptor Development	yes	no	not given	not deposited
1	Plant Cell	kousuke hanada	USA	1	ning jiang	USA	1	2009	1	USDA Cooperative State Research, Education, and Extension Service–National Research Initiative Plant Genome Program and Genetic Mechanism Program to N.J. and National Science Foundation Awards	0	The Functional Role of Pack-MULEs in Rice Inferred from Purifying Selection and Expression Profile	yes	yes	not given	deposited
2	Plant Cell	cristopher I cazonelli	Austrailia	0	barry j pogson	UK	0	2009	0	Australian Research Council Centre of Excellence in Plant Energy Biology	0	Regulation of Carotenoid Composition and Shoot Branching in Arabidopsis by a Chromatin Modifying Histone Methyltransferase, SDG8	yes	yes	not given	deposited
3	Plant Cell	ming jun gao	Canada	0	ming jun gao	Canada	0	2009	0	Agriculture and Agri-Food Canada Canadian Crop Genomics Initiative	0	Repression of Seed Maturation Genes by a Trihelix Transcriptional Repressor in Arabidopsis Seedlings	yes	yes	not given	deposited
4	Plant Cell	song feng li	Austrailia	0	roger w parish	Austrailia	0	2009	0	Grains Research and Development Corporation	0	The Arabidopsis MYB5 Transcription Factor Regulates Mucilage Synthesis, Seed Coat Development, and Trichome Morphogenesis	yes	yes	not given	deposited
5	Plant Cell	cristina pignocchi	UK	0	john H doonan	UK	0	2009	0	Biotechnology and Biological Science Research Council through its Core Strategic Grant to John Innes Centre	0	ENDOSPERM DEFECTIVE1 Is a Novel Microtubule-Associated Protein Essential for Seed Development in Arabidopsis	yes	yes	not given	deposited
6	Plant Cell	Yun Zhou	USA	1	min ni	USA	1	2009	1	National Research Initiative of the USDA Cooperative State Research, Education, and Extension Service	0	SHORT HYPOCOTYL UNDER BLUE1 Associates with MINISEED3 and HAIKU2 Promoters in Vivo to Regulate Arabidopsis Seed Development	yes	yes	not given	deposited
7	Plant Cell	Xuhong Yua	USA	1	chintau lin	USA	1	2009	1	NIH, UCLA faculty research	0	Formation of Nuclear Bodies of Arabidopsis CRY2 in Response to Blue Light Is Associated with Its Blue Light–Dependent Degradation	yes	yes	not given	deposited
8	Plant Cell	Hoo Sun Chunga	USA	1	gregg a howe	USA	1	2009	1	National Institutes of Health Grant R01GM57795 and by the U.S. Department of Energy Grant	0	A Critical Role for the TIFY Motif in Repression of Jasmonate Signaling by a Stabilized Splice Variant of the JASMONATE ZIM-Domain Protein JAZ10 in Arabidopsis	yes	yes	not given	deposited
9	Plant Cell	Kenji Okuda	Japan	0	Toshiharu Shikanaia	Japan	0	2009	0	Grant-in-Aid 16085206 for Scientific Research on Priority Areas, Grant 17GS0316 for Creative Science Research from the Ministry of Education, Culture, Sports, Science, and Technology of Japan	0	Pentatricopeptide Repeat Proteins with the DYW Motif Have Distinct Molecular Functions in RNA Editing and RNA Cleavage in Arabidopsis Chloroplasts	yes	yes	not given	deposited
10	Plant Cell	Yashitola Wamboldta	USA	1	Sally A. Mackenziea	USA	1	2009	1	Department of Energy Grant, Scientific Research on Priority Areas, the Ministry of Education, Culture, Sports, Science, and Technology of Japan	0	Participation of Leaky Ribosome Scanning in Protein Dual Targeting by Alternative Translation Initiation in Higher Plants	yes	yes	not given	deposited
1	PLoS Bio	bernd schierwater	Germany	0	rob desalle	USA	1	2009	0	Alfred P. Sloan Foundation	0	Concatenated Analysis Sheds Light on Early Metazoan Evolution and Fuels a Modern “Urmetazoon” Hypothesis	yes	yes	given	deposited
2	PLoS Bio	jonas berglund	Sweden	0	mathew T webster	USA	1	2009	1	NIH, The Swedish Research Council and Erik-Philip Sörensens Stiftelse	0	Hotspots of Biased Nucleotide Substitutions in Human Genes	yes	yes	given	not deposited
3	PLoS Bio	willem huijbers	Netherlands	0	sander M Daselaar	Netherlands	0	2009	1	NIH, The Netherlands Organisation for Scientific Research, Amsterdam Brain Imaging Platform	0	When Learning and Remembering Compete: A Functional MRI Study	yes	yes	not given	NA
4	PLoS Bio	julian taranda	Argentina.	0	a. belen elgoyhen	Argentina.	0	2009	1	National Institutes of Deafness and other Communication Disorders (NIDCD), Howard Hughes Medical Institute, the National Organization for Hearing Research, the Tinnitus Research Initiative	0	A Point Mutation in the Hair Cell Nicotinic Cholinergic Receptor Prolongs Cochlear Inhibition and Enhances Noise Protection	yes	no	not given	not deposited
5	PLoS Bio	arthur D lander	USA	1	anne L calof, arthur D lander	USA	1	2009	1	NIH	0	Cell Lineages and the Logic of Proliferative Control	yes	yes	not given	deposited
6	PLoS Bio	Aleksandr Vasilyev1	USA	1	Iain A. Drummond1	USA	1	2009	1	National Institutes of Health	0	Collective Cell Migration Drives Morphogenesis of the Kidney Nephron	yes	yes	not given	deposited
7	PLoS Bio	Donatella Valdembri1	Italy	0	Guido Serini1	Italy	0	2009	0	Telethon Italy (GGP04127 to GS), Associazione Augusto per la Vita (to GS), Fondazione Guido Berlucchi (to GS), Associazione Italiana per la Ricerca sul Cancro (to GS and FB), Ministero della Salute—Programma Ricerca Oncologica 2006 and Ricerca Finalizzata 2006 (to GS and FB), Regione Piemonte—Ricerca Sanitaria Finalizzata 2006 and 2008, Ricerca Scientifica Applicata 2004 grants D10 and A150, Rice…	0	Neuropilin-1/GIPC1 Signaling Regulates α5β1 Integrin Traffic and Function in Endothelial Cells	yes	no	not given	not deposited
8	PLoS Bio	Elias G. Bechara1	France	0	Barbara Bardoni1	France	0	2009	0	INSERM, CNRS, Agence Nationale de la Recherche (BB and HM), Fondation Jerôme Lejeune (BB and HM), GIS-Maladies Rares (BB), and CHU de Nice	0	A Novel Function for Fragile X Mental Retardation Protein in Translational Activation	yes	no	not given	not deposited
9	PLoS Bio	Bernd Schuettengruber1	France	0	Giacomo Cavalli1	France	0	2009	0	CNRS, the Human Frontier Science Program Organization (HFSPO), the European Union Framework 6 Programme	0	Functional Anatomy of Polycomb and Trithorax Chromatin Landscapes in Drosophila Embryos Comparison of the genome-wide distribution of PcG, trxG, and sequence-specific DNA binding proteins allowed the identification of key signals leading to Polycomb or Trithorax recruitment.	yes	yes	not given	deposited
10	PLoS Bio	Michal Skružný1	Germany	0	ed hurt	Germany	0	2009	0	Alexander von Humboldt Research Fellowship, CS was supported by a long-term fellowship of the Human Frontiers Science Program, and EH is recipient of grants from the Deutsche Forschungsgemeinschaft (SFB 638/B3) and Fonds der Chemischen Industrie	0	An Endoribonuclease Functionally Linked to Perinuclear mRNP Quality Control Associates with the Nuclear Pore Complexes	yes	no	not given	not deposited
1	PLoS Genetics	Anderly C. Chueh	Austrailia	0	Lee H. Wong	Austrailia	0	2009	0	National Health and Medical Research Council of Australia	0	LINE Retrotransposon RNA Is an Essential Structural and Functional Epigenetic Component of a Core Neocentromeric Chromatin	yes	no	not given	not deposited
2	PLoS Genetics	Lynette Fulton	Germany	0	Kay Schneitz	Germany	0	2009	0	German Research Council	0	DETORQUEO, QUIRKY, and ZERZAUST Represent Novel Components Involved in Organ Development Mediated by the Receptor-Like Kinase STRUBBELIG in Arabidopsis thaliana	yes	yes	not given	deposited
3	PLoS Genetics	Makoto Nakahara	Japan	0	Shunichi Takeda	Japan	0	2009	0	Grant-in-Aid for Scientific Research on Cancer Reseach from the Ministry of Education, Culture, Sports, Science and Technology of Japanese Government	0	Genetic Evidence for Single-Strand Lesions Initiating Nbs1-Dependent Homologous Recombination in Diversification of Ig V in Chicken B Lymphocytes	yes	no	not given	not deposited
4	PLoS Genetics	Tammy A. Morrish	USA	1	Carol W. Greider	USA	1	2009	1	NIH, Leukemia and Lymphoma Society	0	Short Telomeres Initiate Telomere Recombination in Primary and Tumor Cells	yes	no	not given	not deposited
5	PLoS Genetics	Su-In Lee	USA	1	Daphne Koller	USA	1	2009	1	NIH/NHGRI Genome Scholar/ Faculty Transition award and U.S. Department of Energy Genomes to Life Grant (AD), National Science Foundation Award	0	Learning a Prior on Regulatory Potential from eQTL Data	yes	yes	not given	deposited
6	PLoS Genetics	David Reich	USA	1	David Reich	USA	1	2009	1	National Heart, Lung, and Blood Institute, National Center on Minority Health and Health Disparities, Intramural Research Program of the National Institute on Aging,	0	Reduced Neutrophil Count in People of African Descent Is Due To a Regulatory Variant in the Duffy Antigen Receptor for Chemokines Gene	yes	no	not given	not deposited
7	PLoS Genetics	Marie Touchon	France	0	Erick Denamur	France	0	2009	0	Conseil Régional de l'Ile de France, pour la Recherche Médicale	0	Organised Genome Dynamics in the Escherichia coli Species Results in Highly Diverse Adaptive Paths	yes	yes	not given	deposited
8	PLoS Genetics	Jeremiah D. Degenhardt	USA	1	Carlos D. Bustamante	USA	1	2009	1	NIH, National Science Foundation	0	Copy Number Variation of CCL3-like Genes Affects Rate of Progression to Simian-AIDS in Rhesus Macaques (Macaca mulatta	yes	no	not given	not deposited
9	PLoS Genetics	Cintia Hotta Orsi	USA	1	Steven D. Tanksley	USA	1	2009	1	USDA-NRI and the National Science Foundation	0	Natural Variation in an ABC Transporter Gene Associated with Seed Size Evolution in Tomato Species	yes	no	not given	not deposited
10	PLoS Genetics	Stacie E. Hughes	USA	1	R. Scott Hawley	USA	1	2009	1	NIH, American Cancer Society Postdoctoral	0	Heterochromatic Threads Connect Oscillating Chromosomes during Prometaphase I in Drosophila Oocytes	yes	does not apply	not given	NA
1	PLoS Med	Norma C Ware	USA	1	Norma ware	USA	1	2009	1	NIH and havard uni program on AIDS.	0	explaining adherence success in sub-saharan africa: an ethnographic study	yes	does not apply	not given	NA
2	PLoS Med	evelyn korker ansah	UK	0	evelyn korker ansah	UK	0	2009	0	Gates Malaria Partnership with funds from the Bill & Melinda Gates Foundation (BMGF)	0	effect of removing direct payment for health care on utilisation and health outcomes in ghanian children: a randomised controlled trial	yes	does not apply	not given	NA
3	PLoS Med	frances humby	UK	0	constantino pitzalis	UK	0	2009	0	Guy's and St Thomas' Charity (FH), the Arthritis Research Campaign (MB) and INNOCHEM (Innovative Chemokine-based Therapeutic Strategies for Autoimmunity and Chronic inflammation) EU Framework Programme 6 (AM)	0	ectopic lymphoid strutures support ongoing production of class switched autoantibodies in rheumatoid synovium	yes	no	not given	not deposited
4	PLoS Med	Ian Ford	UK	0	Ian ford	UK	0	2009	0	Bristol-Myers Squibb, USA	1	Reduced glomerular filteration rate and its association with clinical outcomes in older patients at risk of vascular events: secondary analysis.	yes	does not apply	not given	NA
5	PLoS Med	James F curtis	USA	1	Maria g castro	USA	1	2009	1	National Institutes of Health/National Institute of Neurological Disorders & Stroke (NIH/NINDS)	0	HMGB 1 mediates endogenous TLR2 activation and brain tumor regresssion	yes	no	not given	not deposited
6	PLoS Med	Raja K. Sivamani1	USA	1	R. Rivkah Isseroff1	USA	1	2009	1	NIH	0	Stress-Mediated Increases in Systemic and Local Epinephrine Impair Skin Wound Healing: Potential New Indication for Beta Blockers	yes	does not apply	not given	NA
7	PLoS Med	james ordi	Spain	0	james ordi	Spain	0	2009	0	Fondo de Investigaciones Sanitarias (PI060207) and The European Commission Research Directorates General, Fifth Framework	0	Clinico-Pathological Discrepancies in the Diagnosis of Causes of Maternal Death in Sub-Saharan Africa: Retrospective Analysis	yes	does not apply	not given	NA
8	PLoS Med	Anne P. G. Crijns	Netherlands	0	Ate G. J. van der Zee	Netherlands	0	2009	0	the Dutch Cancer Society	0	Survival-Related Profile, Pathways, and Transcription Factors in Ovarian Cancer	yes	yes	not given	deposited
9	PLoS Med	Unnur Valdimarsdóttir	Sweden	0	Unnur Valdimarsdóttir	Sweden	0	2009	0	National Alliance for Research on Schizophrenia and Depression (NARSAD) as part of the Toulmin Research Partners Program, and The Swedish Council for Working Life and Social Research	0	Psychotic Illness in First-Time Mothers with No Previous Psychiatric Hospitalizations: A Population-Based Study Unnur Valdimarsdóttir and colleagues studied the risk factors for psychiatric illness following childbirth and found that, for women who had never previously been hospitalized for a psychiatric illness, the risk of mental illness was greatly increased following childbirth.	yes	does not apply	not given	NA
10	PLoS Med	Evelyne Decullier	France	0	François Chapuis	France	0	2009	0	French Ministry of Health (Programme Hospitalier de Recherche Clinique 1998–065); Hospices Civils de Lyon; French Ministry of Research and Higher Education; Université Lyon	0	Inadequate Dissemination of Phase I Trials: A Retrospective Cohort Study	yes	does not apply	not given	NA
1	PLoS Pathogens	Takuya Yamamoto	Japan	0	Takuya Yamamoto	Japan	0	2009	0	AIDS Research and Reference Reagent Program, Division of AIDS	0	Selective Transmission of R5 HIV-1 over X4 HIV-1 at the Dendritic Cell–T Cell Infectious Synapse Is Determined by the T Cell Activation State	yes	no	not given	not deposited
2	PLoS Pathogens	Joel W. Graff	USA	1	Michele E. Hardy	USA	1	2009	1	USDA/NRICGP, Montana Agriculture Experiment Stat	0	Rotavirus NSP1 Inhibits NFκB Activation by Inducing Proteasome-Dependent Degradation of β-TrCP: A Novel Mechanism of IFN Antagonism	yes	no	not given	not deposited
3	PLoS Pathogens	Annemarie Bouma	Netherlands	0	Michiel van Boven	Netherlands	0	2009	0	Dutch Ministry of Agriculture, Nature and Food Safety	0	Estimation of Transmission Parameters of H5N1 Avian Influenza Virus in Chickens	yes	does not apply	not given	NA
4	PLoS Pathogens	Jing Zhang	Singapore	0	Jeak L. Ding	Singapore	0	2009	0	Ministry of Education , National University of Singapore Faculty of Science	0	Local Inflammation Induces Complement Crosstalk Which Amplifies the Antimicrobial Response	yes	no	not given	not deposited
5	PLoS Pathogens	Xiaorong Lin	USA	1	Joseph Heitman	USA	1	2009	1	NIH/NIAID	0	Diploids in the Cryptococcus neoformans Serotype A Population Homozygous for the α Mating Type Originate via Unisexual Mating An Upstream Open Reading Frame Controls Translation of var2csa, a Gene Implicated in Placental Malaria	yes	yes	not given	deposited
6	PLoS Pathogens	Khaled Alkhuder	France	0	Alain Charbit	France	0	2009	0	CNRS, INSERM, and Université René Descartes. grant from Sanofi-Aventis France and Bayer Pharma as part of a multi-institutional call for proposals.	0	Glutathione Provides a Source of Cysteine Essential for Intracellular Multiplication of Francisella tularensis The role of nutrient acquisition systems in survival and multiplication of intracellular bacterial pathogens within infected cells is yet poorly understood. The data presented here suggest that Francisella tularensis, a highly infectious facultative intracellular bacterium, is capable of…	yes	does not apply	not given	NA
7	PLoS Pathogens	Fredric Carlsson	USA	1	Fredric Carlsson	USA	1	2009	0	Genentech Inc	1	Polar Localization of Virulence-Related Esx-1 Secretion in Mycobacteria	yes	no	not given	not deposited
8	PLoS Pathogens	Carolina Agop-Nersesian	Germany	0	Markus Meissner	Germany	0	2009	0	Inkermann Foundation, Wellcome Trust, German Ministry of Science and education	0	Rab11A-Controlled Assembly of the Inner Membrane Complex Is Required for Completion of Apicomplexan Cytokinesis Apicomplexan parasites are unusual in that they replicate by assembling daughter parasites within the mother cell. This involves the ordered assembly of an Inner Membrane Complex (IMC), a scaffold consisting of flattened membrane cisternae and a subpellicular network made up of microtub…	yes	no	not given	not deposited
9	PLoS Pathogens	Joëlle Mounier	France	0	Guy Tran Van Nhieu	France	0	2009	0	Nationale de la Recherche, Programme de Microbiologie-Immunologie	0	The IpaC Carboxyterminal Effector Domain Mediates Src-Dependent Actin Polymerization during Shigella Invasion of Epithelial Cells	yes	no	not given	not deposited
10	PLoS Pathogens	bin jia	USA	1	David T. Evans	USA	1	2009	1	Public Health Service, National Institutes of Health	0	Immunization with Single-Cycle SIV Significantly Reduces Viral Loads After an Intravenous Challenge with SIVmac239	yes	yes	not given	NA
1	Proceedings of the National Academy of Sciences	jun F allard	Canada	0	eric N cytrynbaum	Canada	0	2009	0	National Sciences and Engineering Research Council of Canada	0	Force generation by a dynamic Z-ring in Escherichia coli cell division	yes	does not apply	not given	NA
2	Proceedings of the National Academy of Sciences	antonio G checa	Spain	0	antonio G checa	Spain	0	2009	0	Ministerio de Ciencia e Innovación, Junta de Andalucía	0	The key role of the surface membrane in why gastropod nacre grows in towers	yes	yes	not given	deposited
3	Proceedings of the National Academy of Sciences	martin weigt	USA	1	james A. hoch	USA	1	2009	1	NIH, National Academies Keck Futures Initiative	0	Identification of direct residue contacts in protein–protein interaction by message passing	yes	yes	not given	deposited
4	Proceedings of the National Academy of Sciences	scott t laughlin	USA	1	carolyn R bertozzi	USA	1	2009	0	Grant-in-Aid for scientific research in priority areas “Chemistry of Biological Processes	0	Folding energy landscape and network dynamics of small globular proteins	yes	yes	not given	deposited
5	Proceedings of the National Academy of Sciences	sander I van kastern	UK	0	daniel C anthony	UK	0	2009	0	Glycoform Ltd, Medical Research Council , Cancer Research United Kingdom	0	Glyconanoparticles allow pre-symptomatic in vivo imaging of brain disease	yes	does not apply	not given	NA
6	Proceedings of the National Academy of Sciences	Jonathan L. Payne	USA	1	Jonathan L. Payne	USA	1	2009	1	National Evolutionary Synthesis Center (NESCent), National Science Foundation	0	Two-phase increase in the maximum size of life over 3.5 billion years reflects biological innovation and environmental opportunity	yes	yes	given	deposited
7	Proceedings of the National Academy of Sciences	I Eisenman	USA	1	I Eisenman	USA	1	2009	1	NSF, Yale university	0	Nonlinear threshold behavior during the loss of Arctic sea ice	yes	does not apply	not given	NA
8	Proceedings of the National Academy of Sciences	L S Premo	Germany	0	L S Premo	Germany	0	2009	0	Max Planck Society.	0	Culture, population structure, and low genetic diversity in Pleistocene hominins	yes	yes	not given	NA
9	Proceedings of the National Academy of Sciences	Andreas Hofmann	USA	1	Alexander Pfeifer	USA	1	2009	0	Deutsche Forschungsgemeinschaft Transregio Research Unit 535, the Germany Federal Ministry of Education and Research	0	Combined targeting of lentiviral vectors and positioning of transduced cells by magnetic nanoparticles	yes	yes	not given	NA
10	Proceedings of the National Academy of Sciences	Michael Y. Pavlov	Sweden	0	Anthony C. Forster	USA	1	2009	1	NIH, Swedish Research Council (M.E.) and American Cancer Society grants	0	Slow peptide bond formation by proline and other N-alkylamino acids in translation	yes	yes	not given	NA
1	Science	Nicole Clay	USA	1	Frederick Ausubel	USA	1	2009	1	NIH, NSF	0	Glucosinolate Metabolites Required for an Arabidopsis Innate Immune Response	yes	no	not given	not deposited
2	Science	Pawel Bednarek	Germany	0	Paul Shulz-Lefert	Germany	0	2009	0	Max Planck Chemical Genomics Center, Spanish Ministerio de Educación y Ciencia	0	A Glucosinolate Metabolism Pathway in Living Plant Cells Mediates Broad-Spectrum Antifungal Defense	yes	no	not given	not deposited
3	Science	R. D. Gray	New Zealand	0	S.J. Greenhill	New Zealand	0	2009	0	The Royal Society of New Zealand Marsden Fund and a Bright Futures doctoral scholarship	0	Language Phylogenies Reveal Expansion Pulses and Pauses in Pacific Settlement	yes	yes	given in appendix	NA
4	Science	R. A. Cooper	UK	0	N. E. Hussey	UK	0	2009	0	Engineering and Physical Sciences Research Council (UK), the Royal Society, Laboratoire National des Champs Magnétiques Pulsés, the French Agence Nationale de la Recherche IceNET, and EuroMagNET	0	Anomalous Criticality in the Electrical Resistivity of La2–xSrxCuO4	yes	no	not given	NA
5	Science	Cheng Cen	USA	1	Jeremy Levy	USA	1	2009	1	NSF grant 0704022, Deutsche Forschungsgemeinschaft grant SFB 484, and the European Community	0	Oxide Nanoelectronics on Demand	yes	no	not given	NA
6	Science	Lester O. Hedges	USA	1	Ray H. Baughman	USA	1	2009	1	NSF, the U.S. Office of Naval Research , the Engineering and Physical Sciences Research Council	0	Dynamic Order-Disorder in Atomistic Models of Structural Glass Formers	yes	yes	not given	NA
7	Science	Jochen Schwenk	Germany	0	Nikolaj Klöcker	Germany	0	2009	0	Deutsche Forschungsgemeinschaft	0	Functional Proteomics Identify Cornichon Proteins as Auxiliary Subunits of AMPA Receptors	yes	no	not given	NA
8	Science	R. F. Anderson	USA	1	R F Anderson	USA	1	2009	1	National Oceanic and Atmospheric Administration, by the National Science Foundation, and by the Norwegian Research Council and the Norwegian Polar Institute as part of VISTA project 6535	0	Wind-Driven Upwelling in the Southern Ocean and the Deglacial Rise in Atmospheric CO2	yes	yes	not given	NA
9	Science	Qi Zhang	USA	1	W. Tsien	USA	1	2009	1	the Grass Foundation (Q.Z.), the National Institute of Mental Health, and the Burnett Family Fund	0	The Dynamic Control of Kiss-And-Run and Vesicular Reuse Probed with Single Nanoparticles	yes	yes	not given	NA
10	Science	Ali E. Aliev	USA	1	Ray H. Baughman	USA	1	2009	1	Air Force Office of Scientific Research grant , NSF, Office of Naval Research MURI, Robert A. Welch Foundation, Honda Corporation, Lintec Corporation, and the Brazilian agency CNPq (Conselho Nacional de Desenvolvimento Científico e Tecnológico).	0	Giant-Stroke, Superelastic Carbon Nanotube Aerogel Muscles	yes	no	not given	NA
